# Supplementary material
Source: PubMed Central journal article supplement (PMC6358691)
Supplement: pnas.1815447116.sapp.pdf [file pnas.1815447116.sapp.pdf]

Supplementary Information for

**Extracellular Vesicles Mediate Improved Functional Outcomes in Engineered Cartilage Produced from MSC/Chondrocyte Co-Cultures**

Minwook Kim, David R. Steinberg, Jason A. Burdick, Robert L. Mauck\*

Robert L. Mauck

Email: [lemauck@pennmedicine.upenn.edu](mailto:lemauck@pennmedicine.upenn.edu)

**This PDF file includes:**

Figs. S1 to S9

Tables S1 to S12

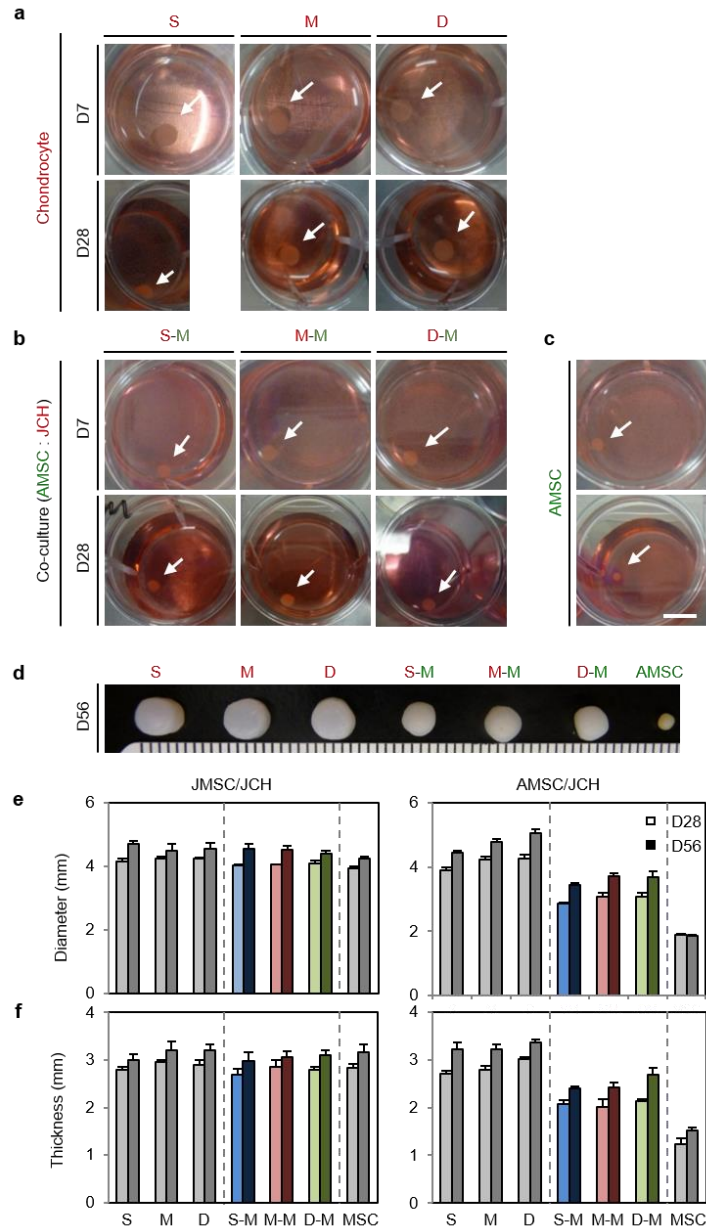

**Fig. S1. Growth of zonal JCH-, AMSC- and co-cultured constructs. (a)** Zonal JCHs, **(b)** AMSC/JCH co-cultures and **(c)** AMSCs alone in MeHA hydrogels at day 7 and 28. **(d)** Gross images of cell-laden constructs at day 56 (AMSC/JCH co-cultures). **(e and f)** Construct dimensions (diameter and thickness) on day 28 and day 56 (left column = JMSC/JCH and right column = AMSC/JCH; lighter bars = day 28 and darker bars = day 56).

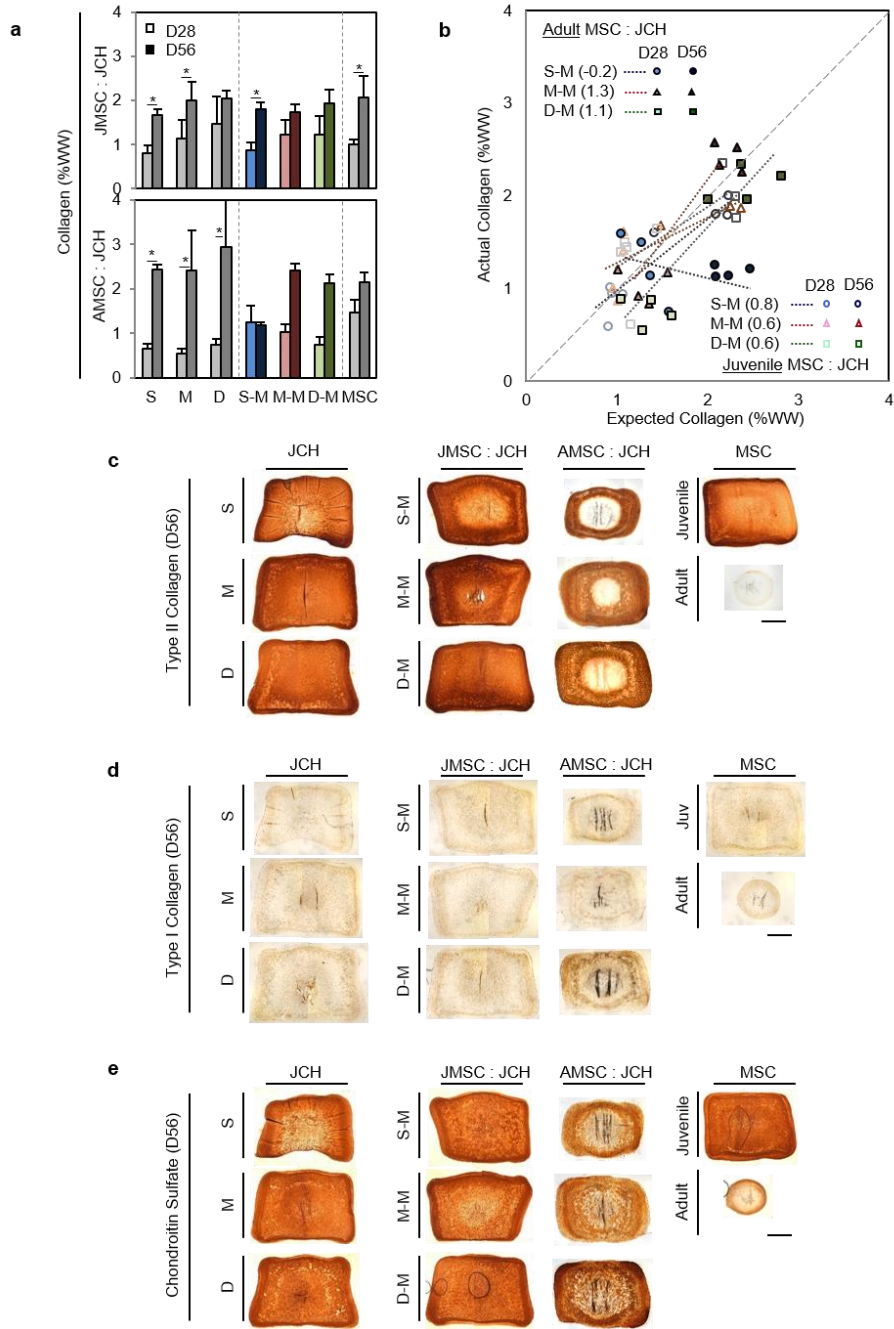

**Fig. S2. Collagen content and immunohistochemistry for collagens and proteoglycans. (a)** Collagen content (%WW). **(b)** Plot of co-culture efficacy for collagen content. **(c-e)** Immunohistochemistry for **(c)** type II collagen, **(d)** type I collagen, and **(e)** chondroitin sulfate at day 56 (JCH = left, Co-cultures = middle, AMSC = right; scale bar = 1mm;  $p < 0.05$ ).

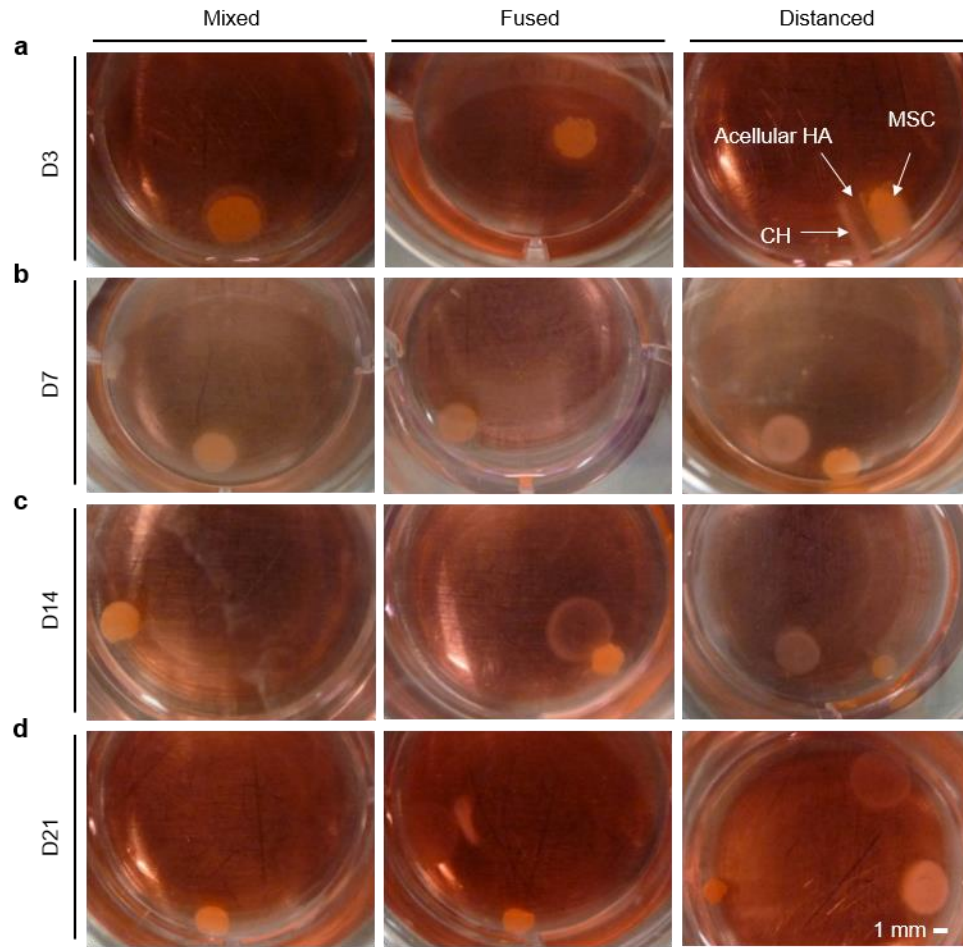

**Fig. S3. Gross appearance of 'mixed', 'fused' and 'distanced' co-cultures of JCHs and AMSCs in MeHA hydrogel constructs.** Images of mixed (left), fused (middle), and distanced (right) constructs on day 3, 7, 14 and 21 (scale bar = 1mm).

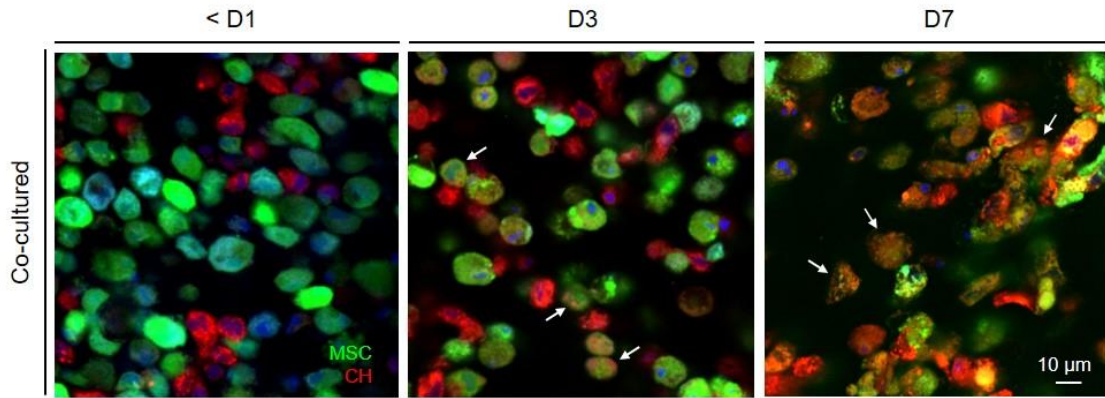

**Fig. S4. Transfer of intracellular contents in AMSC/JCH co-cultures.** Confocal images of JCH (red) and AMSCs (green) in MeHA hydrogels on days 3 and 7, showing increasing number of double positive cells (DP, arrow heads) (scale bar = 10μm).

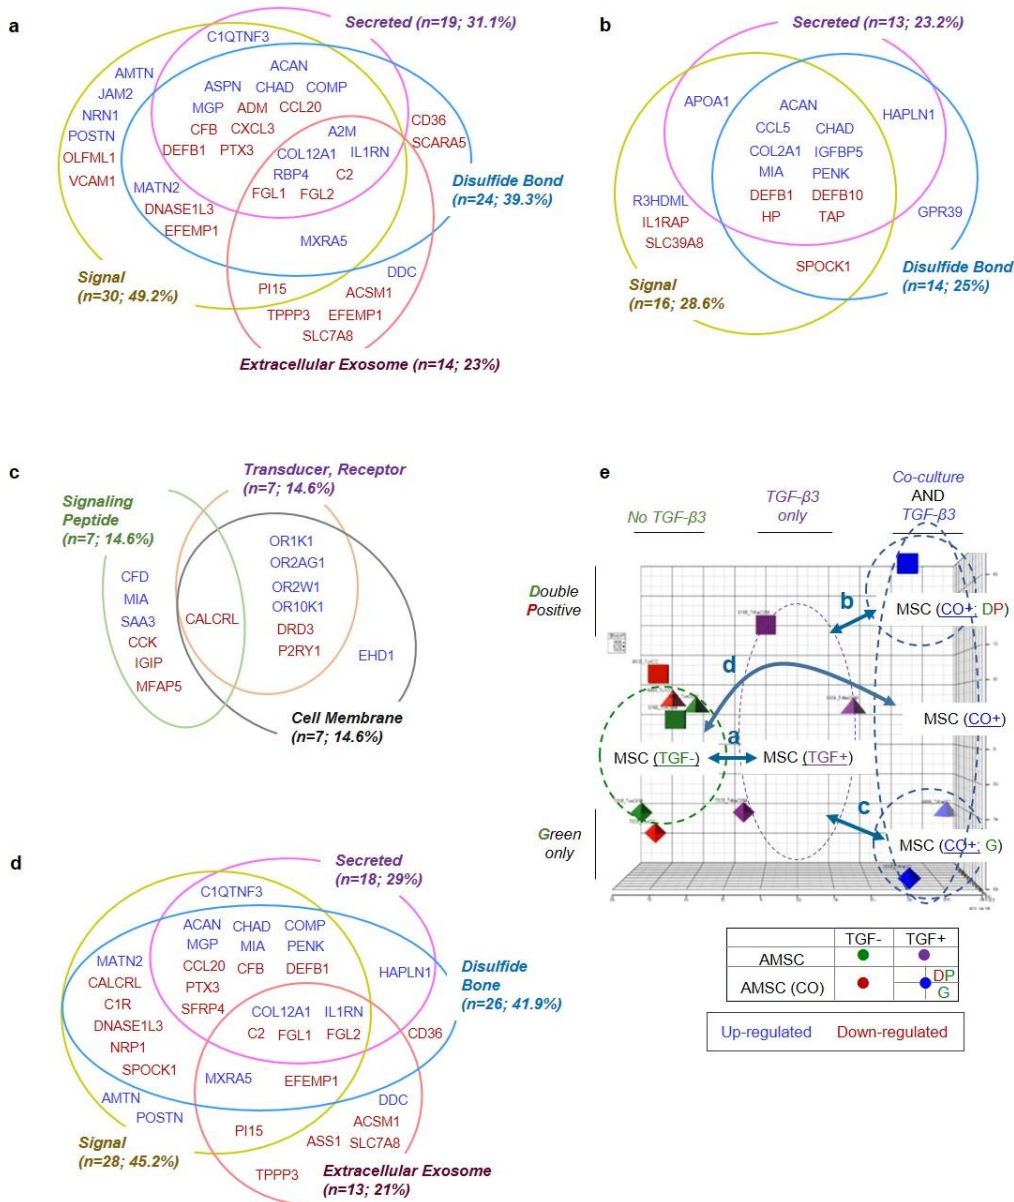

**Fig. S5. Cluster analysis showing pathways induced by TGF-β3 and/or factors secreted from juvenile chondrocytes to adult MSCs in co-culture, displayed via Venn diagrams.** Blue font indicates upregulation, and red font indicates down regulation. **(a)** Adult MSCs alone without TGF-β3 (TGF-\_G) vs. with TGF-β3 (TGF+\_G), **(b)** Adult MSCs alone with TGF-β3 (TGF+\_G) vs. adult MSCs that were co-cultured with TGF-β3 and became double positive (CO+\_DP), **(c)** Adult MSCs with TGF-β3 (TGF+\_G) vs. adult MSCs that were co-cultured with TGF-β3 and remained green only (CO+\_G), **(d)** Adult MSCs without TGF-β3 (TGF-\_G) vs. adult MSCs that were co-cultured with TGF-β3 (CO+), **(e)** PCA analysis from Fig. 4e.



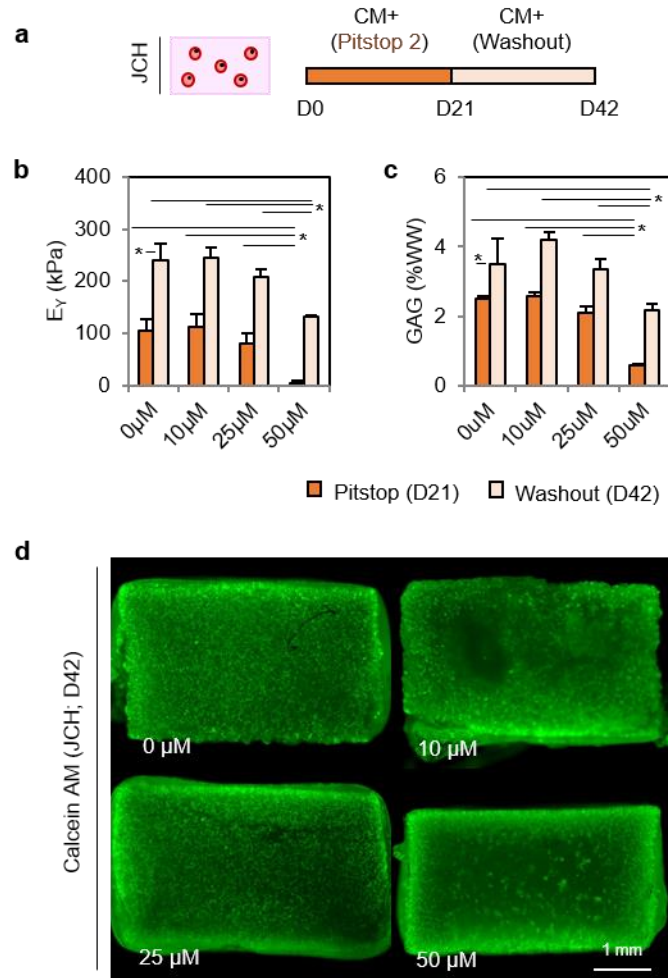

**Fig. S6. Calibration of inhibitors of clathrin-mediated vesicle formation in JCH-laden constructs.** (a) To determine the dose-dependent impact and reversibility of Pitstop2 in exocytic release of extracellular proteins, JCH-laden constructs were cultured in CM+ in the presence of Pitstop2 at a varying concentration (0, 10, 25 and 50 $\mu$ M) for the first 21 days (D0-21) followed by culture for an additional 21 days (D22-42) in the absence of Pitstop2 (washout). Although some attenuation in cellularity and construct properties was noted with the highest dose (50 $\mu$ M) employed ( $p < 0.001$ ), functional properties and GAG content increased after removal of Pitstop2. (b) Analysis of mechanical properties ( $E_v$ : kPa), (c) GAG content (%WW). (d) Cells from all groups were viable and produced comparable ECM. Viability staining (Calcein-AM labeling on day 42) indicated that a dose of 25 $\mu$ M would not inhibit normal chondrocyte matrix accumulation or viability (scale bar = 1mm,  $n = 3-4$ /group;  $p < 0.05$ ).

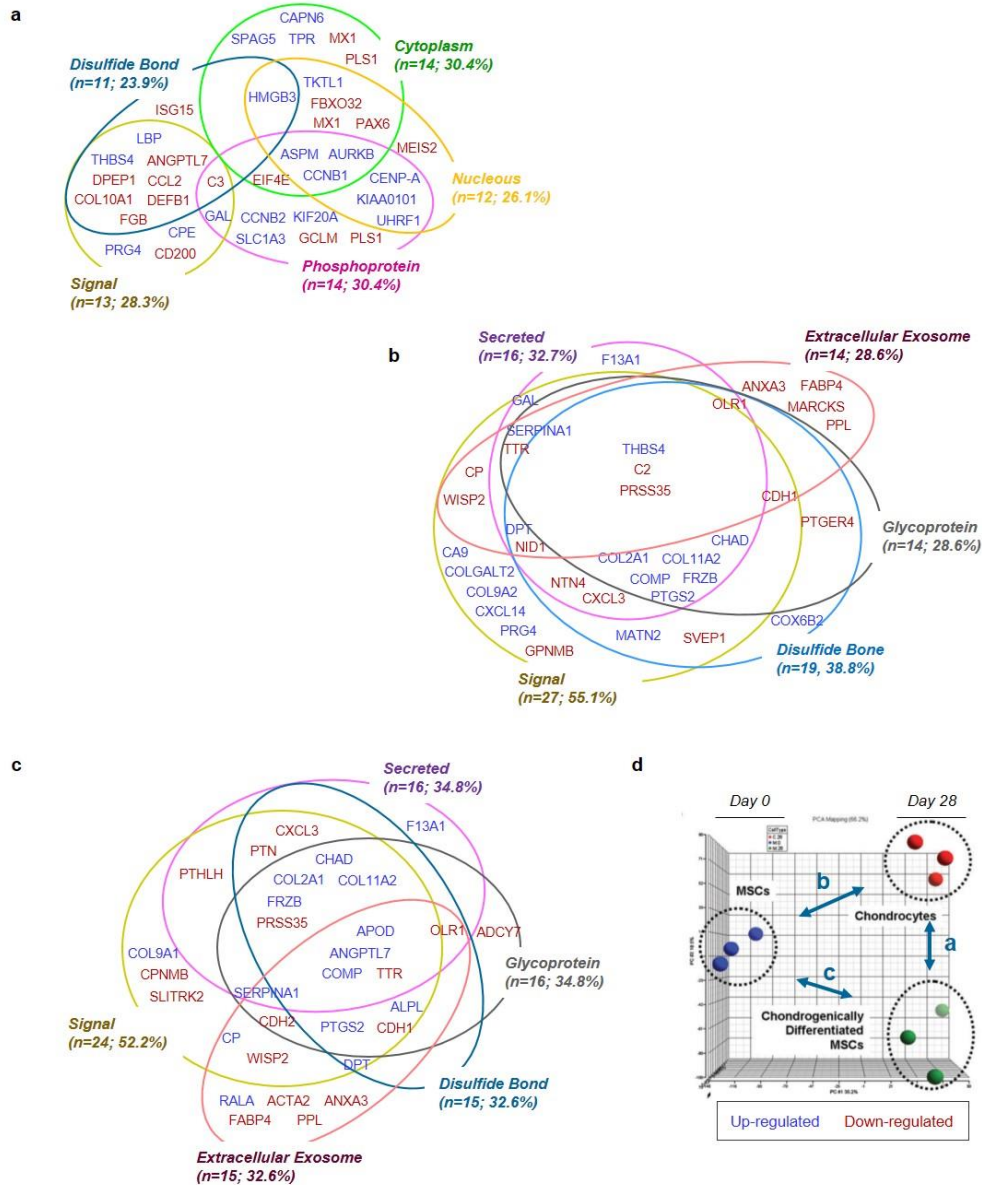

**Fig. S7. Cluster analysis showing the effect of TGF- $\beta$ 3 on juvenile MSCs and chondrocytes in CM at day 28.** Blue font indicates upregulation, and red font indicates down regulation. **(a)** Chondrogenically induced juvenile MSCs with TGF- $\beta$ 3 (CM+) vs. juvenile chondrocytes in CM+, **(b)** Undifferentiated juvenile MSCs without TGF- $\beta$ 3 (CM-) vs. juvenile chondrocytes in CM+, **(c)** Chondrogenically induced juvenile MSCs in CM+ vs. undifferentiated juvenile MSCs in CM- **(d)** PCA analysis adapted with permission from *Huang et al. (1)*.



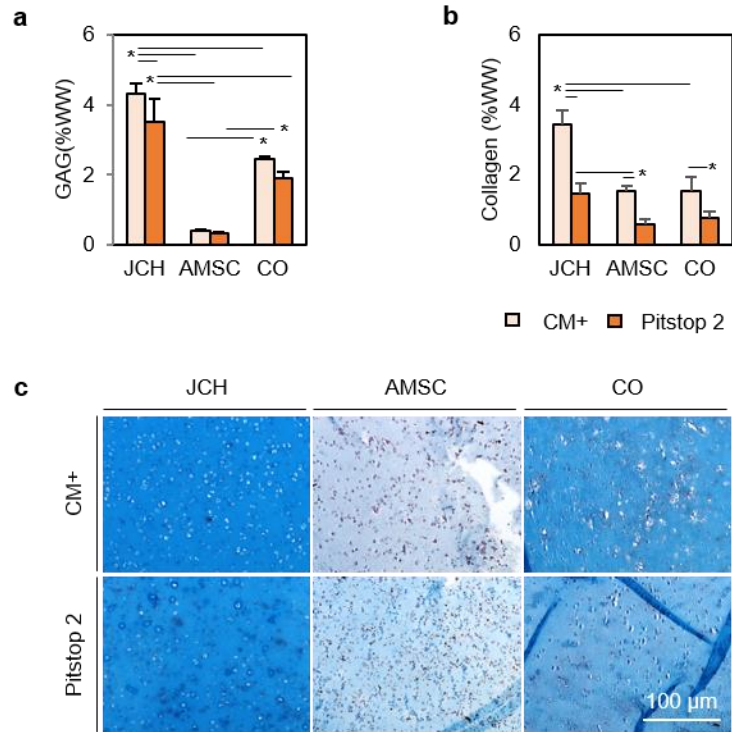

**Fig. S8. Biochemical content of cell-laden constructs cultured with Pitstop 2. (a) GAG (%WW), (b) Collagen (%WW), (c) Alcian blue staining on day 42 (scale bar = 100μm, n=3-4/group;  $p < 0.05$ ).**

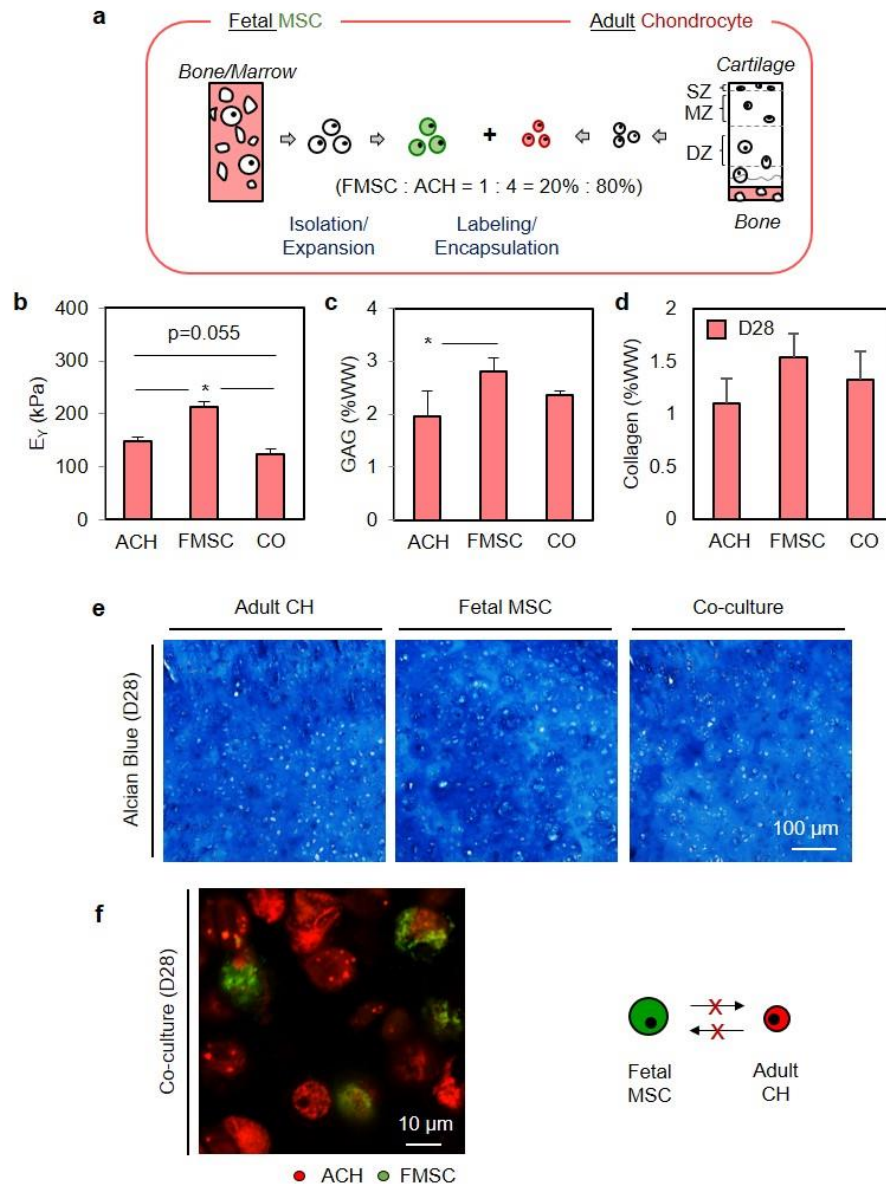

**Fig. S9. Co-culture of fetal MSCs (FMSC) with adult chondrocytes (ACH).** (a) Fetal MSCs and adult chondrocytes were expanded and labeled with CellTracker (MSC= green, CH= red). Fetal MSCs were mixed with adult chondrocytes (MSC:CH = 1:4). (b) Equilibrium modulus ( $E_\gamma$ ; kPa), (c) GAG (%WW), (d) Collagen (%WW), (e) Alcian blue staining on day 28, (f) Confocal microscopy showed no vesicular transport in either direction (Fetal MSC = Green; Adult chondrocyte = red) (scale bar = 100 $\mu$ m, n=3-4/group;  $p < 0.05$ ).

**Table S1.** Differences in expression and fold changes in AMSCs that had become double positive (CO±\_DP) compared to those that remained green (CO±\_G) over 10 days of co-culture, in the absence or presence of TGF-β3, compared to AMSCs cultured on their own (TGF±\_G).

|                     |           | AMSC (CO_DP) |               |              |             | AMSC (CO_G) |              |               |              |             |
|---------------------|-----------|--------------|---------------|--------------|-------------|-------------|--------------|---------------|--------------|-------------|
|                     |           | CO+ vs. TGF+ | TGF+ vs. TGF- | CO- vs. TGF- | CO+ vs. CO- | Gene Symbol | CO+ vs. TGF+ | TGF+ vs. TGF- | CO- vs. TGF- | CO+ vs. CO- |
| <b>Upregulate</b>   | MIR2367   | 44           | 1             | 1            | 41          | MIR2335     | 6            | -1            | -1           | 6           |
|                     | MIR2359   | 22           | -2            | 5            | 3           | ARHGAP20    | 6            | -1            | -1           | 5           |
|                     | HAPLN1    | 22           | 2             | 35           | 1           | HSFY1       | 6            | 1             | -1           | 7           |
|                     | MIA       | 21           | 3             | 35           | 2           | MIA         | 6            | 4             | 10           | 2           |
|                     | R3HDML    | 16           | 1             | -1           | 18          | TSPY        | 5            | 1             | -1           | 6           |
|                     | GPR39     | 14           | -1            | -1           | 20          | ANGPTL5     | 5            | 1             | 1            | 6           |
|                     | COL2A1    | 13           | -1            | 1            | 8           | MIR15A      | 5            | -1            | 1            | 5           |
|                     | APOA1     | 11           | 2             | 2            | 10          | OR1044      | 5            | -1            | -1           | 5           |
|                     | CHAD      | 11           | 5             | -2           | 85          | OR1012      | 4            | 1             | -1           | 6           |
|                     | CENPA     | 9            | 1             | -1           | 15          | OR10H4      | 4            | 1             | -1           | 5           |
|                     | C3H2orf82 | 9            | 1             | 2            | 4           | OR2T1       | 4            | -2            | -1           | 3           |
|                     | MKI67     | 8            | -1            | -1           | 9           | MALL        | 4            | -1            | -1           | 4           |
|                     | CENPF     | 8            | 2             | 1            | 13          | CFD         | 4            | 1             | 1            | 4           |
|                     | CCL5      | 8            | 1             | 2            | 6           | SAA3        | 4            | 1             | 1            | 4           |
|                     | MIR29A    | 8            | -1            | -1           | 8           | HIST1H3A    | 4            | -1            | -1           | 4           |
|                     | PROX1     | 8            | -1            | -1           | 8           | OR1F1       | 4            | -1            | 1            | 3           |
|                     | MIR584-4  | 7            | -1            | 2            | 4           | ARHGAP15    | 4            | 1             | 2            | 2           |
|                     | MIR374B   | 7            | -2            | -1           | 5           | OR8G5       | 4            | -5            | -2           | 2           |
|                     | ESCO2     | 7            | -2            | -1           | 4           | TCEANC      | 4            | -4            | 4            | -5          |
|                     | IGFBP5    | 7            | -3            | -1           | 3           | OR2W1       | 4            | 2             | 2            | 4           |
| DLGAP5              | 7         | 1            | 1             | 8            | OR10K1      | 4           | 1            | 1             | 4            |             |
| MIR2482             | 7         | -1           | -1            | 6            | OR1K1       | 3           | 1            | 1             | 3            |             |
| PENK                | 7         | 5            | -1            | 39           | EHD1        | 3           | 1            | -1            | 4            |             |
| MIR2461             | 7         | 2            | 1             | 10           | MIR2383     | 3           | 1            | -1            | 4            |             |
| ACAN                | 6         | 9            | 12            | 5            | HIST2AG1    | 3           | 1            | 1             | 4            |             |
| FLVCR2              | 6         | -1           | 1             | 4            | OR2AG1      | 3           | -2           | -1            | 2            |             |
| C18H19orf18         | 6         | -1           | -1            | 6            | ZNF280B     | 3           | -1           | 1             | 3            |             |
| MIR2285C            | 6         | 2            | 2             | 6            | H19         | 3           | 1            | 1             | 4            |             |
| KIF20A              | 6         | 1            | -1            | 7            | TNP3        | 3           | 1            | -1            | 3            |             |
| TPT1                | 5         | -1           | -1            | 7            | NOVA1       | 3           | -1           | -1            | 3            |             |
| <b>Downregulate</b> | PRKRIP1   | -5           | -1            | -2           | -3          | OVA         | -3           | 2             | -1           | -1          |
|                     | SLC39A8   | -5           | -6            | -1           | -18         | IGIP        | -3           | 1             | 1            | -3          |
|                     | SPOCK1    | -5           | -3            | -1           | -10         | SEPX1       | -3           | 1             | 1            | -3          |
|                     | PRR3      | -5           | 2             | -1           | -3          | COMMD10     | -3           | -2            | -1           | -5          |
|                     | RGS2      | -5           | -2            | -1           | -9          | CHEK1       | -3           | -1            | -1           | -3          |
|                     | RGS2      | -5           | -1            | -2           | -4          | ARHGAP24    | -3           | 3             | 1            | -1          |
|                     | MIR92A    | -5           | 1             | 1            | -5          | AKR1B1      | -3           | 2             | -1           | -1          |
|                     | RASL11B   | -5           | 5             | 1            | -1          | MFAP5       | -3           | 2             | 1            | -2          |
|                     | PHF15     | -5           | -2            | -1           | -8          | PIR         | -3           | 2             | 1            | -2          |
|                     | PAIP2B    | -6           | 2             | 2            | -6          | EIF2S3Y     | -3           | -2            | -1           | -4          |
|                     | ACSM1     | -6           | -13           | -1           | -77         | SERPINB10   | -3           | 1             | 1            | -3          |
|                     | OCIAD2    | -6           | -3            | 2            | -31         | CDC6        | -3           | 6             | -1           | 3           |
|                     | DEFB10    | -6           | -2            | -2           | -6          | RSAD2       | -3           | 9             | 1            | 2           |
|                     | IL1RAP    | -6           | -2            | 1            | -14         | RAPGEF4     | -3           | 3             | -1           | 1           |
|                     | BRCC3     | -6           | -1            | 1            | -8          | CALCRL      | -3           | 1             | 1            | -3          |
|                     | MIRLET7I  | -7           | -1            | 1            | -9          | IFIT3       | -3           | -4            | -1           | -11         |
|                     | DHDDS     | -7           | -1            | -2           | -4          | MIR2414     | -3           | 1             | -1           | -2          |
|                     | ZNF526    | -7           | 1             | -1           | -5          | CHPT1       | -3           | 3             | 1            | -1          |
|                     | SLC26A2   | -8           | -3            | 1            | -26         | AMTN        | -3           | 2             | 1            | -2          |
|                     | NCALD     | -8           | 4             | -2           | -1          | DRD3        | -3           | 20            | -1           | 8           |
| TNFSF18             | -8        | 8            | -1            | 1            | EFEMP1      | -3          | 3            | 1             | -1           |             |
| BAX                 | -8        | -1           | -1            | -8           | MIR2463     | -3          | -8           | -1            | -19          |             |
| MGST1               | -9        | -6           | 1             | -64          | CCK         | -3          | 2            | 1             | -3           |             |
| HP                  | -10       | -3           | -1            | -26          | ZNF160      | -4          | 5            | -1            | 2            |             |
| AMY2B               | -10       | -3           | -1            | -30          | P2RY1       | -4          | 8            | 1             | 2            |             |
| CFH-L               | -10       | 2            | 2             | -12          | C8H9orf85   | -4          | 1            | -1            | -2           |             |
| DEFB1               | -11       | -2           | -1            | -15          | HIST1H2AI   | -4          | 2            | 2             | -3           |             |
| HIST1H2AE           | -14       | -1           | 1             | -16          | CCRL1       | -4          | 4            | 1             | -2           |             |
| TAP                 | -17       | 2            | -1            | -9           | MIR2384-1   | -4          | 2            | -1            | -3           |             |
| PPARG               | -22       | -3           | -1            | -53          | GGCT        | -5          | 3            | 1             | -2           |             |

**Table S2.** Impact of molecular factors from JCH on the expression of AMSCs that had become double positive (CO±\_DP) compared to those that remained green (CO±\_G) within the same constructs, and their gene-matched fold changes.

|                     | AMSC (CO_DP) |               |              |             |     | AMSC (CO_G)  |               |              |             |  |
|---------------------|--------------|---------------|--------------|-------------|-----|--------------|---------------|--------------|-------------|--|
|                     | CO+ vs. TGF+ | TGF+ vs. TGF- | CO- vs. TGF- | CO+ vs. CO- |     | CO+ vs. TGF+ | TGF+ vs. TGF- | CO- vs. TGF- | CO+ vs. CO- |  |
| <b>Upregulate</b>   | MIR2367      | 44            | 1            | 1           | 41  | 1            | 2             | 1            | 2           |  |
|                     | MIR2359      | 22            | -2           | 5           | 3   | 1            | -1            | 4            | -5          |  |
|                     | HAPLN1       | 22            | 2            | 35          | 1   | 2            | 4             | 7            | 1           |  |
|                     | MIA          | 21            | 3            | 35          | 2   | 6            | 4             | 10           | 2           |  |
|                     | R3HDML       | 16            | 1            | -1          | 18  | 1            | 1             | -1           | 2           |  |
|                     | GPR39        | 14            | -1           | -1          | 20  | 1            | -1            | 1            | 1           |  |
|                     | COL2A1       | 13            | -1           | 1           | 8   | 2            | 1             | -1           | 3           |  |
|                     | APOA1        | 11            | 2            | 2           | 10  | 2            | 4             | -1           | 8           |  |
|                     | CHAD         | 11            | 5            | -2          | 85  | 2            | 17            | 1            | 27          |  |
|                     | CENPA        | 9             | 1            | -1          | 15  | 2            | 5             | 1            | 8           |  |
|                     | C3H2orf82    | 9             | 1            | 2           | 4   | 2            | 1             | -1           | 2           |  |
|                     | MKI67        | 8             | -1           | -1          | 9   | 1            | 5             | 1            | 5           |  |
|                     | CENPF        | 8             | 2            | 1           | 13  | -1           | 3             | -1           | 3           |  |
|                     | CCL5         | 8             | 1            | 2           | 6   | -1           | 1             | 1            | -1          |  |
|                     | MIR29A       | 8             | -1           | -1          | 8   | -1           | 1             | -1           | 1           |  |
|                     | PROX1        | 8             | -1           | -1          | 8   | -1           | 1             | 1            | 1           |  |
|                     | MIR584-4     | 7             | -1           | 2           | 4   | 1            | -1            | -1           | -1          |  |
|                     | MIR374B      | 7             | -2           | -1          | 5   | -1           | 2             | 1            | 1           |  |
|                     | ESCO2        | 7             | -2           | -1          | 4   | -1           | 2             | 1            | 1           |  |
|                     | IGFBP5       | 7             | -3           | -1          | 3   | 2            | -3            | -1           | -1          |  |
|                     | DLGAP5       | 7             | 1            | 1           | 8   | -1           | 5             | 1            | 4           |  |
|                     | MIR2482      | 7             | -1           | -1          | 6   | 1            | -1            | 1            | 1           |  |
|                     | PENK         | 7             | 5            | -1          | 39  | 1            | 4             | 1            | 4           |  |
|                     | MIR2461      | 7             | 2            | 1           | 10  | -3           | 1             | -1           | -2          |  |
| ACAN                | 6            | 9             | 12           | 5           | 2   | 11           | 7             | 3            |             |  |
| FLVCR2              | 6            | -1            | 1            | 4           | 1   | -1           | 1             | 1            |             |  |
| C18H19orf18         | 6            | -1            | -1           | 6           | 2   | -1           | 1             | 1            |             |  |
| MIR2285C            | 6            | 2             | 2            | 6           | 1   | -1           | 2             | -2           |             |  |
| KIF20A              | 6            | 1             | -1           | 7           | 1   | 3            | 1             | 3            |             |  |
| TPT1                | 5            | -1            | -1           | 7           | 1   | -1           | -1            | -1           |             |  |
| <b>Downregulate</b> | PRKRIP1      | -5            | -1           | -2          | -3  | -1           | -1            | -1           | -1          |  |
|                     | SLC39A8      | -5            | -6           | -1          | -18 | 1            | -1            | -1           | -1          |  |
|                     | SPOCK1       | -5            | -3           | -1          | -10 | -2           | -4            | -1           | -7          |  |
|                     | PRR3         | -5            | 2            | -1          | -3  | -1           | -1            | 1            | -2          |  |
|                     | RGS2         | -5            | -2           | -1          | -9  | -1           | -9            | -2           | -4          |  |
|                     | RGS2         | -5            | -1           | -2          | -4  | 2            | -6            | -1           | -2          |  |
|                     | MIR92A       | -5            | 1            | 1           | -5  | 1            | -2            | 2            | -3          |  |
|                     | RASL11B      | -5            | 5            | 1           | -1  | 1            | 2             | 1            | 3           |  |
|                     | PHF15        | -5            | -2           | -1          | -8  | -1           | -2            | -1           | -2          |  |
|                     | PAIP2B       | -6            | 2            | 2           | -6  | 1            | -1            | 1            | -1          |  |
|                     | ACSM1        | -6            | -13          | -1          | -77 | 1            | -17           | -1           | -15         |  |
|                     | OCIAD2       | -6            | -3           | 2           | -31 | -1           | -2            | -1           | -3          |  |
|                     | DEFB10       | -6            | -2           | -2          | -6  | 1            | -1            | 1            | -2          |  |
|                     | IL1RAP       | -6            | -2           | 1           | -14 | -2           | -3            | -1           | -6          |  |
|                     | BRCC3        | -6            | -1           | 1           | -8  | 1            | -2            | -1           | -1          |  |
|                     | MIRLET7I     | -7            | -1           | 1           | -9  | -2           | -2            | -1           | -3          |  |
|                     | DHDDS        | -7            | -1           | -2          | -4  | -2           | 1             | 1            | -3          |  |
|                     | ZNF526       | -7            | 1            | -1          | -5  | -1           | 1             | 1            | -1          |  |
|                     | SLC26A2      | -8            | -3           | 1           | -26 | -1           | -2            | 1            | -2          |  |
|                     | NCALD        | -8            | 4            | -2          | -1  | 1            | 2             | 1            | 1           |  |
|                     | TNFSF18      | -8            | 8            | -1          | 1   | -3           | 2             | -1           | -1          |  |
|                     | BAX          | -8            | -1           | -1          | -8  | -2           | -1            | -1           | -2          |  |
|                     | MGST1        | -9            | -6           | 1           | -64 | 1            | -6            | -1           | -5          |  |
|                     | HP           | -10           | -3           | -1          | -26 | 1            | -1            | 1            | -1          |  |
| AMY2B               | -10          | -3            | -1           | -30         | -2  | -7           | -1            | -16          |             |  |
| CFH-L               | -10          | 2             | 2            | -12         | 1   | -1           | 1             | -1           |             |  |
| DEFB1               | -11          | -2            | -1           | -15         | 2   | -17          | -1            | -9           |             |  |
| HIST1H2AE           | -14          | -1            | 1            | -16         | -4  | 2            | 2             | -3           |             |  |
| TAP                 | -17          | 2             | -1           | -9          | -1  | -1           | 1             | -1           |             |  |
| PPARG               | -22          | -3            | -1           | -53         | 1   | -10          | -1            | -8           |             |  |



**Table S3.** Details on genes that showed positive fold changes in AMSCs with co-culture.

| Gene Symbol | Gene Title                                                                                              | Description/ Function                                                                                                                                                                                                                    | Reference                                                                                                                                                                                                 |
|-------------|---------------------------------------------------------------------------------------------------------|------------------------------------------------------------------------------------------------------------------------------------------------------------------------------------------------------------------------------------------|-----------------------------------------------------------------------------------------------------------------------------------------------------------------------------------------------------------|
| MIR2367     | microRNA 2367                                                                                           | Bos taurus                                                                                                                                                                                                                               | NCBI Gene                                                                                                                                                                                                 |
| MIR2359     | microRNA 2359                                                                                           | Bos taurus                                                                                                                                                                                                                               | NCBI Gene                                                                                                                                                                                                 |
| HAPLN1      | Hyaluronan/PG link protein 1 (CRTL1: cartilage link protein 1)                                          | Contribute to ECM stability and flexibility; Regulated by SOX9                                                                                                                                                                           | Binette et al., 1994 JBC<br>Spicer et al., 2003 JBC<br>Ikuyo et al., 2004 JBC<br>Fang et al., 2014 Arterioscler Thromb Vasc Biol                                                                          |
| MIA         | Melanoma inhibitory activity (CD-RAP: cartilage-derived retinoic acid sensitive protein)                | Found in articular cartilage; Regulated by SOX9                                                                                                                                                                                          | Sakano et al., 1999 JBMR<br>Bossertoff et al., 2003 Biomaterials                                                                                                                                          |
| R3HDML      | R3H domain containing like                                                                              | Peptidase inhibitor (a putative serine protease inhibitor); Cysteine-rich secretory protein; May act as an anti-fungal agent                                                                                                             | Gibbs et al., 2008 Endocr Rev                                                                                                                                                                             |
| GPR39       | G protein-coupled receptor 39                                                                           | Block Hedgehog signaling that causes heterotopic ossification                                                                                                                                                                            | Regard et al., 2013 Nat Med<br>Bassilana et al., 2014 Nat Chem Biol                                                                                                                                       |
| COL2A1      | Collagen, type II, alpha 1                                                                              | Major component of articular cartilage                                                                                                                                                                                                   |                                                                                                                                                                                                           |
| APOA1       | Apolipoprotein A-1                                                                                      | Main functional protein of HDL (high-density lipoprotein); Transports endogenous microRNAs to recipient cells; Decrease accumulation of atherosclerosis by removing LDL                                                                  | Vickers et al., 2011 Nat Cell Biol<br>Chen et al., 2012 Trends Cell Biol<br>Wu et al., 2014 Arterioscler Thromb Vasc Biol<br>Michell et al., 2016 BBA                                                     |
| CHAD        | Chondroadherin                                                                                          | A leucine rich repeat ECM protein in cell-matrix interaction; Binds cells via integrin and cell surface PGs; Acts as an anchor to ECM by binding to collagens                                                                            | Hessle et al., 2013 PLOSOne<br>Batista et al., 2014 Mat Biol<br>Tillgren et al., 2015 JBC                                                                                                                 |
| CENPA       | Centromere protein A (Histone H3 variant)                                                               | Recruited to chromatin in DNA damage; Essential for growth and development;                                                                                                                                                              | Van Hooser et al., 2001 JCS<br>Zeitlin et al., 2009 PNAS                                                                                                                                                  |
| C3H2orf82   | Chromosome 3 open reading frame, human C2orf82                                                          | Chromosome 3 C2orf82 homolog                                                                                                                                                                                                             | NCBI Gene                                                                                                                                                                                                 |
| MKI67       | Marker of proliferation Ki-67 (Ki-67)                                                                   | Reflect cellular proliferation rate; Exclusively expressed in proliferating cells (maintaining proliferation); Interact with KIF15                                                                                                       | Gerdes et al., 1984 J Immunol<br>Bullwinkel et al., 2006 JCP                                                                                                                                              |
| CENPF       | Centromere protein F (Mitotin)                                                                          | Involved in proliferation, differentiation and stress response associated with ATF4                                                                                                                                                      | Yang et al., 2003 Cell Res<br>Zhou et al., 2005 JBC<br>Yan et al., 2012 Proteomics                                                                                                                        |
| CCL5        | Chemokine (C-C motif) ligand 5; (RANTES; regulated on activation, normal T cell expressed and secreted) | CCR3 was expressed at the mRNA level and increased during MSC-derived chondrogenesis; Chemokine receptors were expressed in chondrocytes; Expressed in normal and OA cartilage; Exert anti-apoptotic effect mediated by Erk/Akt pathway; | Borzi et al., 2000 Arthritis Rheum<br>Alaaeddine et al., 2001 Arthritis Rheum<br>Mazzetti et al., 2004 Arthritis Rheum<br>Djouad et al., 2007 Arthritis Res Ther<br>Hofer et al., 2016 Stem Cell Res Ther |
| MIR29A      | microRNA 29A                                                                                            | Up-regulated in normal cartilage; Inhibit osteonectin expression                                                                                                                                                                         | Goldring et al., 2012 Trends Mol Med<br>Shang et al., 2013 J Cell Mol Med<br>Li et al., 2016 Mol. Cells                                                                                                   |
| PROX1       | Prospero homeobox 1                                                                                     | Regulate FGFRs expressed in proliferating or hypertrophic chondrocytes                                                                                                                                                                   | Liu et al., 2002 Genes Dev<br>Audette et al., 2015 Development                                                                                                                                            |
| MIR584-4    | microRNA 584-4                                                                                          | Bos taurus                                                                                                                                                                                                                               | NCBI Gene                                                                                                                                                                                                 |
| MIR374B     | microRNA 374B                                                                                           | Inhibit angiogenesis by targeting VEGF regulated by CCL3 through CCR1 and CCR5                                                                                                                                                           | Sohn et al., 2015 J Cancer<br>Liao et al., 2015 Oncotarget                                                                                                                                                |
| ESCO2       | Establishment of sister chromatid cohesion N-acetyltransferase 2                                        | An acetyltransferase that converts chromatin-bound cohesins to a tether-competent state; Induce mitosis and proliferation                                                                                                                | Kim et al., 2008 BBRC<br>Banerji et al., 2016 Dev Dyn                                                                                                                                                     |
| IGFBP5      | Insulin-like growth factor binding protein 5                                                            | Regulate the availability of IGF-1, an anabolic factor involved in matrix synthesis and chondrocyte survival                                                                                                                             | Buechli et al., 2013 Stem Cells Dev                                                                                                                                                                       |
| DLGAP5      | Disc, large (Drosophila) homolog-associated protein 5                                                   | Promote cell proliferation, migration and invasion                                                                                                                                                                                       | Liao et al., 2013 PLOSOne                                                                                                                                                                                 |
| MIR2482     | microRNA 2482                                                                                           | Bos taurus                                                                                                                                                                                                                               | NCBI Gene                                                                                                                                                                                                 |
| PENK        | Proenkephalin                                                                                           | Attenuate inflammation by stimulating secretion of IL-10                                                                                                                                                                                 | Milwid et al., 2014 Mol Ther                                                                                                                                                                              |
| MIR2461     | microRNA 2461                                                                                           | Bos taurus                                                                                                                                                                                                                               | NCBI Gene                                                                                                                                                                                                 |
| ACAN        | Aggrecan                                                                                                | Major component of articular cartilage                                                                                                                                                                                                   |                                                                                                                                                                                                           |
| FLVCR2      | Feline leukemia virus subgroup C cellular receptor family, member 2-like (FLVCR2)                       | Import heme and transport calcium-chelator complex; Regulate growth and calcium metabolism                                                                                                                                               | Braiser et al., 2004 Exp Cell Res<br>Duffy et al., 2010 Mol Cell Biol                                                                                                                                     |
| C18H19orf18 | Chromosome 18 open reading frame, human C19orf18                                                        | Chromosome 18 C19orf18 homolog                                                                                                                                                                                                           | NCBI Gene                                                                                                                                                                                                 |
| MIR2285C    | microRNA 2285C                                                                                          | Bos taurus                                                                                                                                                                                                                               | NCBI Gene                                                                                                                                                                                                 |
| KIF20A      | Kinesin family member 20A                                                                               | Expressed in healthy DNA; Mitotic cell cycle                                                                                                                                                                                             | Kim et al., 2014 PLOSOne                                                                                                                                                                                  |
| TPT1        | Tumor protein, translationally-controlled 1-like (TCTP)                                                 | Anti-apoptosis                                                                                                                                                                                                                           | Liu et al., 2005 Mol Cell Biol<br>Susini et al., 2008 Cell Death Diff<br>Thebault et al., 2016 Sci Rep                                                                                                    |

**Table S4.** Details on genes that showed negative fold changes in AMSCs with co-culture.

| Gene Symbol                        | Gene Title                                                                                                             | Description/Function                                                                                                                                                                  | Reference                                                                                                                 |
|------------------------------------|------------------------------------------------------------------------------------------------------------------------|---------------------------------------------------------------------------------------------------------------------------------------------------------------------------------------|---------------------------------------------------------------------------------------------------------------------------|
| PRKRIP1                            | PRKR interacting protein 1 (IL11 inducible)                                                                            |                                                                                                                                                                                       |                                                                                                                           |
| SLC39A8                            | Solute carrier family 39 (zinc transporter), member 8                                                                  | Majority of cancer tissues displayed cytoplasmic and/or membranous positivity at a various degree                                                                                     |                                                                                                                           |
| SPOCK1                             | Sparc/osteonectin, cwcv and kazal-like domains proteoglycan (testican) 1                                               | Promote tumor growth and metastasis in cancer cells by activating the PI3K-AKT pathway                                                                                                | Shu et al., 2015, Mol Caner; Yang et al., 2015, Tum Biol; Chen et al., 2016, Drug Design Dev and Ther                     |
| PRR3                               | Proline rich 3                                                                                                         | Induced by DNA damage response; Increase DNA-damage-induced apoptosis via mitochondrial death pathway; Localized in mitochondrial and interacted with Bcl-2 (pro-apoptotic activator) | Tibaldi et al., 2011, Biochem J; Lou et al., 2013, Mol Oncol;                                                             |
| RGS2-like                          | Regulator of G-protein signaling 2-like                                                                                | Accelerate hypertrophic differentiation; Regulate endochondral bone development                                                                                                       | James et al., Mol Biol Cell. 2005                                                                                         |
| RGS2                               | Regulator of G-protein signaling 2, 24kDa                                                                              |                                                                                                                                                                                       |                                                                                                                           |
| MIR92A                             | microRNA 92A                                                                                                           | Directly target Noggin3 mRNA (BMP antagonist), Promote craniofacial development and chondrogenic proliferation; Promote tumor proliferation and inhibit tumor apoptosis;              | Ning et al., 2013 Dev Cell; Li et al., 2014, Exp Cell Res                                                                 |
| RASL11B                            | RAS-like, family 11, member B                                                                                          | Play a role in TGFb1-mediated developmental processes such as inflammation, cancer and arteriosclerosis                                                                               | Stolle et al., BBA 2007                                                                                                   |
| PHF15                              | PHD finger protein 15                                                                                                  | Zinc ion binding                                                                                                                                                                      |                                                                                                                           |
| PAIP2B                             | Poly(A) binding protein (PABP) interacting protein 2B                                                                  |                                                                                                                                                                                       |                                                                                                                           |
| ACSM1 (also known as MACS1, BUCS1) | Acyl-CoA synthetase medium-chain family member 1 (Middle-Chain Acyl-CoA Synthetase 1; Butyryl Coenzyme A Synthetase 1) |                                                                                                                                                                                       |                                                                                                                           |
| OCIAD2                             | OCIA domain containing 2                                                                                               | Cancer-related protein; Increase malignant progression                                                                                                                                | Nagata et al., 2012, Pathol Int; Zhang et al., 2014, Biomed Res Int                                                       |
| DEFB10                             | Beta-defensin 10                                                                                                       | Antibacterial activity; Exist in neutrophils (WBC)                                                                                                                                    | Selsted et al., 1993, JBC; Sung et al., 2016, Cell Microbiol                                                              |
| IL1RAP                             | Interleukin 1 receptor accessory protein                                                                               | Induce synthesis of pro-inflammatory proteins during infection, tissue damage or stress at the cell membrane                                                                          |                                                                                                                           |
| BRCC3                              | BRCA1/BRCA2-containing complex, subunit 3                                                                              | Promote activating inflammation                                                                                                                                                       | Py et al., 2012, Mol Cell                                                                                                 |
| MIRLET7I                           | microRNA let-7i                                                                                                        | Repress cell proliferation (i.e., tumor suppression)                                                                                                                                  | Johnson, 2007, Cancer                                                                                                     |
| DHDDS                              | Dehydrololichyl diphosphate synthase                                                                                   | Promote trafficking of LDL-derived cholesterol; LDL correlates with ectopic bone formation in OA                                                                                      | De Munter et al., 2013, Arthritis Res Ther                                                                                |
| ZNF526                             | Zinc finger protein 526                                                                                                |                                                                                                                                                                                       |                                                                                                                           |
| SLC26A2                            | Solute carrier family 26 (sulfate transporter), member 2; Diastrophic dysplasia sulfate transporter (DTDST)            | Transmembrane glycoprotein. Cause diastrophic dysplasia; Play a role in endochondral bone formation                                                                                   | Satoh et al., 1998, JBC; Lamb et al., 2007, Arthritis Rheum                                                               |
| NCALD                              | Neurocalcin delta                                                                                                      | Neuronal calcium sensor family of calcium-binding protein                                                                                                                             | Terasawa et al., 1992 JBC                                                                                                 |
| TNFSF18                            | Tumor necrosis factor (ligand) superfamily, member 18                                                                  | Pro-apoptotic; Mediate NF-kB activation                                                                                                                                               | Liang et al., 2014, Cell Trans                                                                                            |
| BAX                                | BCL2-associated X protein                                                                                              | Pro-apoptotic activator; Inhibit caspase activity by preventing the release of cytochrome C from the mitochondria                                                                     | Oltval et al., 1993, Cell                                                                                                 |
| MGST1                              | Microsomal glutathione S-transferase 1                                                                                 | Activated by oxidative stress                                                                                                                                                         | Aniya et al., 1993, Biochem Pharm                                                                                         |
| HP                                 | Haptoglobin                                                                                                            | Inflammation marker; Bind to hemoglobin in RBC (carrying O2) produced in bone marrow; (Low HP indicates low Hemoglobin (hypoxic condition))                                           | Stevens et al., 2008, Arthritis Rheum; Druke et al., 2012, Nephrol Dial Trans; Balakrishnan et al., 2014, Clin Proteomics |
| AMY2B                              | Amylase, alpha 2B (pancreatic)                                                                                         | Hydrolyze proteoglycan                                                                                                                                                                |                                                                                                                           |
| CFH-L                              | Complement factor H-like                                                                                               | Produced (secreted) by MSCs; increased by TNF-a and interferon-r (IFN-r);                                                                                                             | Ruddy et al., 1975 Ann NY Acad Sci; Tu et al., 2010, Stem Cells Dev                                                       |
| DEFB1                              | Beta-defensin 1-like                                                                                                   | Microbicidal and cytotoxic peptides made by neutrophils; *Defensin in neutrophils (WBC)                                                                                               | Sung et al., 2016, Cell Microbiol; Selsted et al., 1993, JBC                                                              |
| HIST1H2AE                          | Histone cluster 1, H2ae/ Histone H2A type 1-B/E                                                                        |                                                                                                                                                                                       |                                                                                                                           |
| TAP                                | Tracheal antimicrobial peptide (Beta defensin)                                                                         | Antibacterial effect. Beta defensin is secreted from MSCs via TLR4; A family of cysteine-rich antimicrobial peptides from neutrophils (WBC);                                          | Sung et al., 2016, Cell Microbiol; Selsted et al., 1993, JBC                                                              |
| PPARG                              | Peroxisome proliferator-activated receptor gamma                                                                       | Adipogenic marker; Promote the progression of PTOA                                                                                                                                    | Ratneswaran et al., 2015 Arth Reum                                                                                        |



**Table S5.** Expression of genes and fold changes based on biological themes, enriched functional-related gene clusters, and expression levels based on the effect of TGF-β3 in adult MSCs (AMSC).

| AMSC (TGF+ G) vs. AMSC (TGF- G) |             | Secreted/ Disulfide bond/Signal/Glycoprotein (6.55)                              | ECM/Cell adhesion (2.47) | Extracellular region (2.24) | EGF-like domain/Calcium (1.67) | TNF signaling/Inflammatory response (1.55) | Leucine-rich (1.2) | Immunoglobulin (1) | Mitosis/Cell division/Cell cycle (0.87) | Transcription/Cytoplasm/Nucleus (0.32) | Transmembrane (0.03) |
|---------------------------------|-------------|----------------------------------------------------------------------------------|--------------------------|-----------------------------|--------------------------------|--------------------------------------------|--------------------|--------------------|-----------------------------------------|----------------------------------------|----------------------|
| Gene Symbol                     | Fold Change | Gene Title                                                                       |                          |                             |                                |                                            |                    |                    |                                         |                                        |                      |
| C1QTNF3                         | 61          | C1q and tumor necrosis factor related protein 3                                  | •                        |                             |                                |                                            |                    |                    |                                         |                                        |                      |
| HIST1H2AD                       | 31          | Histone cluster 1, H2                                                            |                          | •                           |                                |                                            |                    |                    |                                         |                                        |                      |
| POSTN                           | 27          | Periostin, osteoblast specific factor                                            | •                        |                             |                                |                                            |                    |                    |                                         |                                        |                      |
| RRM2                            | 22          | Ribonucleotide reductase M2                                                      |                          |                             |                                |                                            |                    |                    |                                         |                                        |                      |
| COMP                            | 17          | Cartilage oligomeric matrix protein                                              | •                        | •                           | •                              |                                            |                    |                    |                                         |                                        |                      |
| PTTG1                           | 15          | Pituitary tumor-transforming 1                                                   |                          |                             |                                |                                            |                    | •                  | •                                       |                                        |                      |
| MXRA5                           | 14          | Matrix-remodelling associated 5                                                  |                          |                             |                                | •                                          | •                  |                    |                                         |                                        |                      |
| IL1RN                           | 13          | Interleukin 1 receptor antagonist                                                | •                        |                             |                                |                                            |                    |                    |                                         |                                        |                      |
| AMTN                            | 12          | Amelotin                                                                         |                          |                             |                                |                                            |                    |                    |                                         |                                        |                      |
| CHAD                            | 12          | Chondroadherin                                                                   | •                        | •                           |                                | •                                          |                    |                    |                                         |                                        |                      |
| MGP                             | 11          | Matrix Gla protein                                                               | •                        |                             | •                              |                                            |                    |                    | •                                       | •                                      |                      |
| MID1                            | 11          | Midline 1 (Optiz/BBB syndrome)                                                   |                          |                             |                                |                                            |                    | •                  | •                                       |                                        |                      |
| HIST1H2AI                       | 11          | Histone cluster 1, H2ai-like                                                     |                          |                             |                                |                                            |                    |                    |                                         |                                        |                      |
| ACAN                            | 11          | Aggrecan                                                                         | •                        | •                           | •                              |                                            | •                  |                    |                                         |                                        |                      |
| DTL                             | 10          | Denticleless protein homolog                                                     |                          |                             |                                |                                            |                    |                    |                                         |                                        |                      |
| CLCA2                           | 10          | Chloride channel accessory 2                                                     |                          |                             |                                |                                            |                    |                    |                                         |                                        | •                    |
| DDC                             | 10          | Dopa Decarboxylase protein-like                                                  |                          |                             |                                |                                            |                    |                    |                                         |                                        |                      |
| NOX4                            | 9           | NADPH oxidase 4                                                                  |                          |                             |                                |                                            |                    |                    |                                         |                                        | •                    |
| ENPP1                           | 9           | Ectonucleotide pyrophosphatase/phosphodiesterase 1                               |                          |                             |                                |                                            |                    |                    |                                         |                                        | •                    |
| COL12A1                         | 9           | Collagen, type XII, alpha 1                                                      | •                        | •                           |                                |                                            |                    |                    |                                         |                                        |                      |
| ASPN                            | 9           | Asporin                                                                          | •                        | •                           | •                              | •                                          |                    |                    |                                         |                                        |                      |
| PMEP1                           | 8           | Prostate transmembrane protein, androgen induced 1                               |                          |                             |                                |                                            |                    |                    |                                         |                                        |                      |
| MATN2                           | 8           | Matrilin 2                                                                       |                          |                             | •                              |                                            |                    |                    |                                         |                                        |                      |
| HIST1H2AD                       | 8           | Histone cluster 1, H2                                                            |                          |                             |                                |                                            |                    |                    |                                         |                                        |                      |
| A2M                             | 7           | Alpha-2-macroglobulin                                                            | •                        | •                           |                                |                                            |                    |                    |                                         |                                        |                      |
| RBP4                            | 7           | Retinol binding protein 4, plasma                                                | •                        | •                           |                                |                                            |                    |                    |                                         |                                        |                      |
| BEX3                            | 7           | Protein BEX3-like                                                                |                          |                             |                                |                                            |                    | •                  | •                                       |                                        |                      |
| UBE2C                           | 7           | Ubiquitin-conjugating enzyme E2C                                                 |                          |                             |                                |                                            |                    | •                  | •                                       |                                        |                      |
| JAM2                            | 7           | Junctional adhesion molecule 2                                                   | •                        |                             |                                |                                            | •                  |                    |                                         |                                        | •                    |
| NRN1                            | 7           | Neuritin 1                                                                       | •                        |                             |                                |                                            |                    |                    |                                         |                                        |                      |
| PPARG                           | -6          | Peroxisome proliferator-activated receptor gamma                                 |                          |                             |                                |                                            |                    | •                  | •                                       |                                        |                      |
| ADM                             | -6          | Adrenomedullin                                                                   | •                        |                             |                                |                                            |                    |                    |                                         |                                        |                      |
| OLFML1                          | -6          | Olfactomedin-like 1                                                              | •                        |                             |                                |                                            |                    |                    |                                         |                                        |                      |
| CFB                             | -6          | Complement factor B                                                              | •                        | •                           |                                |                                            |                    |                    |                                         |                                        |                      |
| VCAM1                           | -7          | Vascular cell adhesion molecule 1                                                | •                        |                             |                                | •                                          | •                  |                    |                                         |                                        | •                    |
| CX3CL1                          | -7          | Chemokine (C-X3-C motif) ligand 1                                                | •                        |                             |                                | •                                          |                    |                    |                                         |                                        | •                    |
| CCL20                           | -7          | Chemokine (C-C motif) ligand 20                                                  | •                        |                             |                                | •                                          |                    |                    |                                         |                                        |                      |
| KCNE4                           | -7          | Potassium voltage-gated channel, Isk-related family, member 4                    |                          |                             |                                |                                            |                    |                    |                                         |                                        | •                    |
| C2                              | -7          | Complement component 2                                                           | •                        | •                           |                                |                                            |                    |                    |                                         |                                        |                      |
| PK4                             | -8          | Pyruvate dehydrogenase kinase, isozyme 4                                         |                          |                             |                                |                                            |                    |                    |                                         |                                        |                      |
| TPPP3                           | -8          | Tubulin polymerization-promoting protein family member 3                         |                          |                             |                                |                                            |                    |                    |                                         |                                        | •                    |
| DNASE1L3                        | -8          | Deoxyribonuclease I-like 3                                                       |                          |                             |                                | •                                          |                    |                    |                                         |                                        |                      |
| DEFB1                           | -8          | Beta-defensin 1-like                                                             | •                        | •                           |                                |                                            |                    |                    |                                         |                                        |                      |
| RASSF2                          | -9          | Ras association (RalGDS/AF-6) domain family member 2                             |                          |                             |                                |                                            |                    |                    | •                                       | •                                      |                      |
| S100G                           | -9          | S100 calcium binding protein G                                                   |                          |                             |                                | •                                          | •                  |                    | •                                       | •                                      |                      |
| MT1E                            | -9          | Metallothionein 1E                                                               |                          |                             |                                |                                            |                    |                    |                                         |                                        |                      |
| CXCL6                           | -9          | Chemokine (C-X-C motif) ligand 6 (granulocyte chemotactic protein 2)             |                          |                             |                                |                                            |                    |                    |                                         |                                        |                      |
| ENPP5                           | -9          | Ectonucleotide pyrophosphatase/phosphodiesterase 5 (putative)                    |                          |                             |                                |                                            |                    |                    |                                         |                                        |                      |
| SCARA5                          | -9          | Scavenger receptor class A, member 5 (putative)                                  | •                        |                             |                                |                                            |                    |                    |                                         |                                        | •                    |
| TNFSF15                         | -9          | Tumor necrosis factor (ligand) superfamily, member 15                            |                          |                             |                                |                                            |                    |                    |                                         |                                        | •                    |
| CXCL3                           | -9          | Chemokine (C-X-C motif) ligand 3                                                 | •                        |                             |                                | •                                          |                    |                    |                                         |                                        |                      |
| EFEMP1                          | -10         | EGF containing fibulin-like extracellular matrix protein 1                       |                          |                             | •                              | •                                          |                    |                    |                                         |                                        |                      |
| PI15                            | -10         | Peptidase inhibitor 15                                                           | •                        |                             |                                |                                            |                    |                    |                                         |                                        |                      |
| STAT4                           | -11         | Signal transducer and activator of transcription 4                               |                          |                             |                                |                                            |                    |                    |                                         |                                        |                      |
| CD36                            | -13         | CD36 molecule (thrombospondin receptor)                                          |                          | •                           |                                |                                            |                    | •                  | •                                       | •                                      |                      |
| FGL1                            | -13         | Fibrinogen-like 1                                                                | •                        |                             |                                |                                            |                    |                    |                                         |                                        |                      |
| FGL2                            | -14         | Fibrinogen-like 2                                                                | •                        |                             |                                |                                            |                    |                    |                                         |                                        |                      |
| PTX3                            | -15         | Pentraxin 3, long                                                                | •                        | •                           |                                |                                            |                    |                    |                                         |                                        |                      |
| SLC7A8                          | -16         | Solute carrier family 7 (amino acid transporter light chain, L system), member 8 |                          |                             |                                |                                            |                    |                    |                                         |                                        | •                    |
| ACSM1                           | -16         | Acyl-CoA synthetase medium-chain family member 1                                 |                          |                             |                                |                                            |                    |                    |                                         |                                        |                      |

**Table S6.** Expression of genes and fold changes based on biological themes, enriched functional-related gene clusters, and their expression levels based on the effect of TGF- $\beta$ 3 and/or molecular factors from co-cultured JCH (CO+\_DP) in AMSCs.

| AMSC (CO+_DP) vs. AMSC (TGF+ G) |             |                                                                          | Antibiotic/Extracellular region (3.78) | Secreted/Disulfide bond/Signal (3.37) | ECM/Glycoprotein (2.01) | Metal binding (0.72) | Immunoglobulin (0.54) | DNA binding/Nucleus (0.24) | Transmembrane (0.01) |
|---------------------------------|-------------|--------------------------------------------------------------------------|----------------------------------------|---------------------------------------|-------------------------|----------------------|-----------------------|----------------------------|----------------------|
| Gene Symbol                     | Fold Change | Gene Title                                                               |                                        |                                       |                         |                      |                       |                            |                      |
| MIR2367                         | 44          | MIR2367                                                                  |                                        |                                       |                         |                      |                       |                            |                      |
| MIR2359                         | 22          | MIR2359                                                                  |                                        |                                       |                         |                      |                       |                            |                      |
| HAPLN1                          | 22          | Hyaluronan and proteoglycan link protein 1                               |                                        | •                                     | •                       |                      | •                     |                            |                      |
| MIA                             | 21          | Melanoma inhibitory activity                                             | •                                      | •                                     |                         |                      |                       |                            |                      |
| R3HDML                          | 16          | R3H domain containing-like                                               |                                        | •                                     |                         |                      |                       |                            |                      |
| GPR39                           | 14          | G protein-coupled receptor 39                                            |                                        | •                                     | •                       | •                    |                       |                            | •                    |
| COL2A1                          | 13          | Collagen, type II, alpha 1                                               | •                                      | •                                     | •                       | •                    |                       |                            |                      |
| APOA1                           | 11          | Apolipoprotein A-I                                                       |                                        | •                                     | •                       |                      |                       |                            |                      |
| CHAD                            | 11          | Chondroadherin                                                           |                                        | •                                     | •                       |                      |                       |                            |                      |
| CENPA                           | 9           | Centromere protein A                                                     |                                        |                                       |                         |                      | •                     |                            |                      |
| C3H2orf82                       | 9           | Chromosome 3 open reading frame, human C2orf82                           |                                        |                                       |                         |                      |                       |                            |                      |
| MKI67                           | 8           | Antigen KI-67                                                            |                                        |                                       |                         |                      |                       |                            |                      |
| CENPF                           | 8           | Centromere protein F, 350/400kDa (mitosin)                               |                                        |                                       |                         |                      |                       |                            |                      |
| CCL5                            | 8           | Chemokine (C-C motif) ligand 5                                           |                                        | •                                     |                         |                      |                       |                            |                      |
| MIR29A                          | 8           | MicroRNA mir-29a                                                         |                                        |                                       |                         |                      |                       |                            |                      |
| PROX1                           | 8           | Prospero homeobox 1                                                      |                                        |                                       |                         |                      |                       |                            |                      |
| MIR584-4                        | 7           | MicroRNA mir-584-4                                                       |                                        |                                       |                         |                      |                       |                            |                      |
| MIR374B                         | 7           | MicroRNA mir-374b                                                        |                                        |                                       |                         |                      |                       |                            |                      |
| ESCO2                           | 7           | Establishment of cohesion 1 homolog 2 (S. cerevisiae)                    |                                        |                                       |                         |                      |                       |                            |                      |
| IGFBP5                          | 7           | Insulin-like growth factor binding protein 5                             |                                        | •                                     |                         |                      |                       |                            |                      |
| DLGAP5                          | 7           | Discs, large (Drosophila) homolog-associated protein 5                   |                                        |                                       |                         |                      |                       |                            |                      |
| MIR2482                         | 7           | MicroRNA mir-2482                                                        |                                        |                                       |                         |                      |                       |                            |                      |
| PENK                            | 7           | Proenkephalin                                                            | •                                      | •                                     |                         |                      |                       |                            |                      |
| MIR2461                         | 7           | MicroRNA mir-2461                                                        |                                        |                                       |                         |                      |                       |                            |                      |
| ACAN                            | 6           | Aggrecan                                                                 | •                                      | •                                     | •                       | •                    | •                     |                            |                      |
| FLVCR2                          | 6           | Feline leukemia virus subgroup C cellular receptor family, member 2-like |                                        |                                       |                         |                      |                       |                            | •                    |
| C18H19orf18                     | 6           | Chromosome 18 open reading frame, human C19orf18                         |                                        |                                       |                         |                      |                       |                            |                      |
| MIR2285C                        | 6           | MicroRNA mir-2285c                                                       |                                        |                                       |                         |                      |                       |                            |                      |
| KIF20A                          | 6           | Kinesin family member 20A                                                |                                        |                                       |                         |                      |                       |                            |                      |
| TPT1                            | 5           | Tumor protein, translationally-controlled 1-like                         |                                        |                                       |                         |                      |                       |                            |                      |
| PRKRIP1                         | -5          | PRKR interacting protein 1 (IL11 inducible)                              |                                        |                                       |                         |                      | •                     |                            |                      |
| SLC39A8                         | -5          | Solute carrier family 39 (zinc transporter), member 8                    |                                        | •                                     |                         |                      |                       |                            | •                    |
| SPOCK1                          | -5          | Spar/osteonectin, cwcv and kazal-like domains proteoglycan (testican) 1  |                                        | •                                     | •                       |                      |                       |                            |                      |
| PRR3                            | -5          | Proline rich 3                                                           |                                        |                                       |                         | •                    |                       |                            |                      |
| RGS2                            | -5          | Regulator of G-protein signaling 2-like                                  |                                        |                                       |                         |                      |                       |                            | •                    |
| RGS2                            | -5          | Regulator of G-protein signaling 2, 24kDa                                |                                        |                                       |                         |                      |                       |                            | •                    |
| MIR92A                          | -5          | MicroRNA mir-92a                                                         |                                        |                                       |                         |                      |                       |                            |                      |
| RASL11B                         | -5          | RAS-like, family 11, member B                                            |                                        |                                       |                         |                      |                       |                            |                      |
| PHF15                           | -5          | PHD finger protein 15                                                    |                                        |                                       |                         |                      |                       |                            |                      |
| PAIP2B                          | -6          | Poly(A) binding protein interacting protein 2B                           |                                        |                                       |                         |                      |                       |                            |                      |
| ACSM1                           | -6          | Acyl-CoA synthetase medium-chain family member 1                         |                                        |                                       |                         |                      | •                     |                            |                      |
| OCIAD2                          | -6          | OCIA domain containing 2                                                 |                                        |                                       |                         |                      |                       |                            |                      |
| DEFB10                          | -6          | Beta-defensin 10                                                         | •                                      | •                                     |                         |                      |                       |                            |                      |
| IL1RAP                          | -6          | Interleukin 1 receptor accessory protein                                 |                                        | •                                     |                         |                      | •                     |                            | •                    |
| BRCC3                           | -6          | BRCA1/BRCA2-containing complex, subunit 3                                |                                        |                                       |                         |                      | •                     |                            | •                    |
| MIRLET7I                        | -7          | MicroRNA let-7i                                                          |                                        |                                       |                         |                      |                       |                            |                      |
| DHDDS                           | -7          | Dehydrosulfolipid diphosphate synthase                                   |                                        |                                       |                         |                      |                       |                            |                      |
| ZNF526                          | -7          | Zinc finger protein 526                                                  |                                        |                                       |                         |                      | •                     |                            | •                    |
| SLC26A2                         | -8          | Solute carrier family 26 (sulfate transporter), member 2                 |                                        |                                       | •                       |                      |                       |                            | •                    |
| NCALD                           | -8          | Neurocalcin delta                                                        |                                        |                                       |                         |                      | •                     |                            |                      |
| TNFSF18                         | -8          | Tumor necrosis factor (ligand) superfamily, member 18                    |                                        |                                       |                         |                      |                       |                            | •                    |
| BAX                             | -8          | BCL2-associated X protein                                                |                                        |                                       |                         |                      |                       |                            | •                    |
| MGST1                           | -9          | Microsomal glutathione S-transferase 1                                   |                                        |                                       |                         |                      |                       |                            | •                    |
| HP                              | -10         | Haptoglobin                                                              | •                                      | •                                     | •                       |                      |                       |                            |                      |
| AMY2B                           | -10         | Amylase, alpha 2B (pancreatic)                                           |                                        |                                       |                         |                      |                       |                            |                      |
| CFH-L                           | -10         | Complement factor H-like                                                 |                                        |                                       |                         |                      |                       |                            |                      |
| DEFB1                           | -11         | Beta-defensin 1-like                                                     | •                                      | •                                     |                         |                      |                       |                            |                      |
| HIST1H2AE                       | -14         | Histone cluster 1, H2ai-like                                             |                                        |                                       |                         |                      |                       |                            |                      |
| TAP                             | -17         | Tracheal antimicrobial peptide                                           | •                                      | •                                     |                         |                      |                       |                            |                      |
| PPARG                           | -22         | Peroxisome proliferator-activated receptor gamma                         |                                        |                                       |                         | •                    |                       | •                          |                      |

**Table S7.** Expression of genes and fold changes based on biological themes, enriched functional-related gene clusters, and their expression levels based on the effect of TGF- $\beta$ 3 and co-culture for cells where vesicular transfer did not occur (CO+\_G) in AMSCs.

| AMSC (CO+_G) vs. AMSC (TGF+ G) |             |                                                                                  |   | GTPase activation/Signal transduction (1.46)<br>Secreted/Disulfide bond/Signal (1.06)<br>Receptor/Cell membrane (0.76) |   |   |
|--------------------------------|-------------|----------------------------------------------------------------------------------|---|------------------------------------------------------------------------------------------------------------------------|---|---|
| Gene Symbol                    | Fold Change | Gene Title                                                                       |   |                                                                                                                        |   |   |
| MIR2335                        | 6           | MicroRNA mir-2335                                                                |   |                                                                                                                        |   |   |
| ARHGAP20                       | 6           | Rho GTPase activating protein 20-like                                            | • |                                                                                                                        |   |   |
| HSFY1                          | 6           | Heat shock transcription factor, Y-linked-like                                   |   |                                                                                                                        |   |   |
| MIA                            | 6           | Melanoma inhibitory activity                                                     |   | •                                                                                                                      |   |   |
| TSPY                           | 5           | Envelope glycoprotein-like                                                       |   |                                                                                                                        |   |   |
| ANGPTL5                        | 5           | Angiotensin-like 5                                                               |   | •                                                                                                                      | • |   |
| MIR15A                         | 4           | MicroRNA mir-15a                                                                 |   |                                                                                                                        |   |   |
| OR1044                         | 4           | Olfactory receptor 1044-like                                                     |   |                                                                                                                        |   |   |
| OR1012                         | 4           | Olfactory receptor Olr1012-like                                                  |   |                                                                                                                        |   |   |
| OR10H4                         | 4           | Olfactory receptor, family 10, subfamily H, member 4-like                        |   |                                                                                                                        |   |   |
| OR2T1                          | 4           | Olfactory receptor, family 2, subfamily T, member 1-like                         |   |                                                                                                                        |   |   |
| MALL                           | 4           | Mal, T-cell differentiation protein-like                                         |   |                                                                                                                        |   | • |
| CFD                            | 4           | Complement factor D-like                                                         |   | •                                                                                                                      |   |   |
| SAA3                           | 4           | Serum amyloid A 3                                                                |   | •                                                                                                                      |   |   |
| HIST1H3A                       | 4           | Histone cluster 1, H3a-like                                                      |   |                                                                                                                        |   |   |
| OR1F1                          | 4           | Olfactory receptor, family 1, subfamily F, member 1-like                         |   |                                                                                                                        |   |   |
| ARHGAP15                       | 3           | Rho GTPase activating protein 15-like                                            | • |                                                                                                                        |   | • |
| OR8G5                          | 3           | Olfactory receptor, family 8, subfamily G, member 5                              |   |                                                                                                                        |   | • |
| TCEANC                         | 3           | Transcription elongation factor A (SII) N-terminal and central domain containing |   |                                                                                                                        |   |   |
| OR2W1                          | 3           | Olfactory receptor, family 2, subfamily W, member 1-like                         |   |                                                                                                                        |   | • |
| OR10K1                         | 3           | Olfactory receptor, family 10, subfamily K, member 1-like                        |   |                                                                                                                        |   | • |
| OR1K1                          | 3           | Olfactory receptor, family 1, subfamily L, member 8-like                         |   |                                                                                                                        |   | • |
| EHD1                           | 3           | EH-domain containing 1 (predicted)-like                                          |   |                                                                                                                        |   | • |
| MIR2383                        | 3           | MicroRNA mir-2383                                                                |   |                                                                                                                        |   |   |
| HIST2AG1                       | 3           | Histone cluster 1, H4i-like                                                      |   |                                                                                                                        |   |   |
| OR2AG1                         | 3           | Olfactory receptor, family 2, subfamily AG, member 1                             |   |                                                                                                                        |   | • |
| ZNF280B                        | 3           | Zinc finger protein 280B                                                         |   |                                                                                                                        |   |   |
| H19                            | 3           | H19, imprinted maternally expressed transcript (non-protein coding)              |   |                                                                                                                        |   |   |
| TNP3                           | 3           | Spermatid nuclear transition protein 3-like                                      |   |                                                                                                                        |   |   |
| NOVA1                          | 3           | Neuro-oncological ventral antigen 1                                              |   |                                                                                                                        |   |   |
| OVA                            | -3          | Ovalbumin-like                                                                   |   |                                                                                                                        |   |   |
| IGIP                           | -3          | IgA regulatory protein                                                           |   | •                                                                                                                      |   |   |
| SEPX1                          | -3          | Selenoprotein X, 1                                                               |   |                                                                                                                        |   |   |
| COMMD10                        | -3          | COMMD domain containing 10                                                       |   |                                                                                                                        |   |   |
| CHEK1                          | -3          | CHK1 checkpoint homolog (S. pombe)                                               |   |                                                                                                                        |   |   |
| ARHGAP24                       | -3          | Rho GTPase activating protein 24                                                 | • |                                                                                                                        |   |   |
| AKR1B1                         | -3          | Aldo-keto reductase family 1, member B1 (aldose reductase)                       |   |                                                                                                                        |   |   |
| MFAP5                          | -3          | Microfibrillar associated protein 5                                              |   | •                                                                                                                      |   |   |
| PIR                            | -3          | Pirin (iron-binding nuclear protein)                                             |   |                                                                                                                        |   |   |
| EIF2S3Y                        | -3          | Eukaryotic translation initiation factor 2, subunit 3, structural gene Y-linked  |   |                                                                                                                        |   |   |
| SERPINB10                      | -3          | Serpin peptidase inhibitor, clade B (ovalbumin), member 10                       |   |                                                                                                                        |   |   |
| CDC6                           | -3          | Cell division cycle 6 homolog (S. cerevisiae)                                    |   |                                                                                                                        |   |   |
| RSAD2                          | -3          | Radical S-adenosyl methionine domain containing 2                                |   |                                                                                                                        |   | • |
| RAPGEF4                        | -3          | Rap guanine nucleotide exchange factor (GEF) 4                                   |   |                                                                                                                        |   |   |
| CALCRL                         | -3          | Calcitonin receptor-like                                                         |   | •                                                                                                                      | • |   |
| IFIT3                          | -3          | Interferon-induced protein with tetratricopeptide repeats 3                      |   |                                                                                                                        |   |   |
| MIR2414                        | -3          | MicroRNA mir-2414                                                                |   |                                                                                                                        |   |   |
| CHPT1                          | -3          | Choline phosphotransferase 1                                                     |   |                                                                                                                        |   | • |
| AMTN                           | -3          | Amelotin                                                                         |   | •                                                                                                                      |   |   |
| DRD3                           | -3          | Dopamine receptor D3                                                             |   |                                                                                                                        |   | • |
| EFEMP1                         | -3          | EGF containing fibulin-like extracellular matrix protein 1                       |   | •                                                                                                                      |   |   |
| MIR2463                        | -3          | MicroRNA mir-2463                                                                |   |                                                                                                                        |   |   |
| CCK                            | -4          | Cholecystokinin                                                                  |   | •                                                                                                                      |   |   |
| ZNF160                         | -4          | Zinc finger protein 160-like                                                     |   |                                                                                                                        |   |   |
| P2RY1                          | -4          | Purinergic receptor P2Y, G-protein coupled, 1                                    |   | •                                                                                                                      | • |   |
| C8H9orf85                      | -4          | Chromosome 8 open reading frame, human C9orf85                                   |   |                                                                                                                        |   |   |
| HIST1H2AI                      | -4          | Histone cluster 1, H2ai-like                                                     |   |                                                                                                                        |   |   |
| CCRL1                          | -4          | Chemokine (C-C motif) receptor-like 1                                            |   |                                                                                                                        |   |   |
| MIR2384-1                      | -4          | MicroRNA mir-2384-1                                                              |   |                                                                                                                        |   |   |
| GGCT                           | -5          | Gamma-glutamylcyclotransferase                                                   |   |                                                                                                                        |   |   |



**Table S8.** Expression of genes and fold changes based on biological themes, enriched functional-related gene clusters, and their expression levels based on the effect of TGF- $\beta$ 3 and molecular factors from co-cultured JMSCs in adult MSCs.

| AMSC (CO+) vs. AMSC (TGF-) |             |                                                                                  | Secreted/ Disulfide bond/Signal/Glycoprotein (5.78) | ECM/Cell adhesion/Immunoglobulin-like (2.42) | Extracellular region/Protease/Hydrolase (1.68) | Immunoglobulin (0.68) | ATP-binding/Nucleotide-binding (0.26) | Immune response/Transmembrane (0.25) |
|----------------------------|-------------|----------------------------------------------------------------------------------|-----------------------------------------------------|----------------------------------------------|------------------------------------------------|-----------------------|---------------------------------------|--------------------------------------|
| Gene Symbol                | Fold Change | Gene Title                                                                       |                                                     |                                              |                                                |                       |                                       |                                      |
| HIST1H2AD                  | 70          | Histone cluster 1, H2                                                            |                                                     |                                              |                                                |                       |                                       |                                      |
| POSTN                      | 39          | Periostin, osteoblast specific factor                                            |                                                     |                                              |                                                |                       |                                       |                                      |
| CHAD                       | 37          | Chondroadherin                                                                   | •                                                   | •                                            |                                                |                       |                                       |                                      |
| C1QTNF3                    | 37          | C1q and tumor necrosis factor related protein 3                                  | •                                                   |                                              | •                                              |                       |                                       |                                      |
| COMP                       | 37          | Cartilage oligomeric matrix protein                                              | •                                                   | •                                            | •                                              |                       |                                       |                                      |
| ACAN                       | 32          | Aggrecan                                                                         | •                                                   | •                                            | •                                              | •                     |                                       | •                                    |
| PTTG1                      | 32          | Pituitary tumor-transforming 1                                                   |                                                     |                                              |                                                | •                     |                                       |                                      |
| MIA                        | 28          | Melanoma inhibitory activity                                                     | •                                                   |                                              | •                                              |                       |                                       |                                      |
| RRM2                       | 27          | Ribonucleotide reductase M2                                                      |                                                     |                                              |                                                |                       |                                       |                                      |
| MGP                        | 27          | Matrix Gla protein                                                               | •                                                   | •                                            |                                                |                       |                                       |                                      |
| HIST1H2AI                  | 20          | Histone cluster 1, H2ai-like                                                     |                                                     |                                              |                                                |                       |                                       |                                      |
| UBE2C                      | 17          | Ubiquitin-conjugating enzyme E2C                                                 |                                                     |                                              |                                                | •                     |                                       | •                                    |
| COL12A1                    | 15          | Collagen, type XII, alpha 1                                                      | •                                                   | •                                            |                                                | •                     |                                       |                                      |
| BEX3                       | 13          | Protein BEX3-like                                                                |                                                     |                                              |                                                | •                     |                                       |                                      |
| HAPLN1                     | 12          | Hyaluronan and proteoglycan link protein 1                                       | •                                                   | •                                            |                                                | •                     |                                       |                                      |
| HIST1H2AD                  | 12          | Histone cluster 1, H2                                                            |                                                     |                                              |                                                |                       |                                       |                                      |
| TOP2A                      | 11          | Topoisomerase (DNA) II alpha 170kDa                                              |                                                     |                                              |                                                |                       |                                       | •                                    |
| IL1RN                      | 11          | Interleukin 1 receptor antagonist                                                | •                                                   |                                              |                                                |                       |                                       |                                      |
| MATN2                      | 10          | Matrilin 2                                                                       | •                                                   | •                                            |                                                |                       |                                       |                                      |
| ENPP1                      | 10          | Ectonucleotide pyrophosphatase/phosphodiesterase 1                               |                                                     |                                              |                                                |                       |                                       | •                                    |
| CENPA                      | 10          | Centromere protein A                                                             |                                                     |                                              |                                                |                       |                                       |                                      |
| AMTN                       | 9           | Amelotin                                                                         |                                                     |                                              |                                                |                       |                                       |                                      |
| DTL                        | 9           | Denticless protein homolog                                                       |                                                     |                                              |                                                |                       |                                       |                                      |
| PKIB                       | 9           | Protein kinase (cAMP-dependent, catalytic) inhibitor beta                        |                                                     |                                              |                                                |                       |                                       |                                      |
| MCOLN3                     | 8           | Mucopolip 3                                                                      |                                                     |                                              |                                                |                       |                                       | •                                    |
| PCLAF                      | 8           | PNCA Clamp Associated Factor (KIAA0101 ortholog)                                 |                                                     |                                              |                                                |                       |                                       |                                      |
| HIST1H2AH                  | 8           | Histone cluster 1, H2ah                                                          |                                                     |                                              |                                                |                       |                                       |                                      |
| PENK                       | 8           | Proenkephalin                                                                    | •                                                   |                                              | •                                              |                       |                                       | •                                    |
| MXRA5                      | 8           | Matrix-remodelling associated 5                                                  | •                                                   |                                              | •                                              |                       |                                       | •                                    |
| DDC                        | 8           | Dopa Decarboxylase protein-like                                                  |                                                     |                                              |                                                |                       |                                       |                                      |
| SFRP4                      | -9          | Secreted frizzled-related protein 4                                              | •                                                   |                                              |                                                |                       |                                       | •                                    |
| C1R                        | -9          | Complement component 1, r subcomponent                                           | •                                                   | •                                            | •                                              |                       |                                       |                                      |
| DNASE1L3                   | -9          | Deoxyribonuclease 1-like 3                                                       | •                                                   |                                              | •                                              |                       |                                       |                                      |
| MT1E                       | -9          | Metallothionein 1E                                                               |                                                     |                                              |                                                |                       |                                       |                                      |
| RGS2                       | -10         | Regulator of G-protein signaling 2-like                                          |                                                     |                                              |                                                | •                     |                                       | •                                    |
| SPOCK1                     | -10         | Sparc/osteonectin, cwcv and kazal-like domains proteoglycan (testican) 1         | •                                                   | •                                            | •                                              |                       |                                       |                                      |
| TPPP3                      | -10         | Tubulin polymerization-promoting protein family member 3                         |                                                     |                                              |                                                | •                     |                                       |                                      |
| CFB                        | -10         | Complement factor B                                                              | •                                                   |                                              | •                                              |                       |                                       |                                      |
| TNFSF15                    | -10         | Tumor necrosis factor (ligand) superfamily, member 15                            |                                                     |                                              |                                                |                       |                                       | •                                    |
| NRP1                       | -11         | Neuropilin 1                                                                     | •                                                   | •                                            |                                                |                       |                                       | •                                    |
| ASS1                       | -11         | Argininosuccinate synthase 1                                                     |                                                     |                                              |                                                |                       |                                       | •                                    |
| MGST1                      | -12         | Microsomal glutathione S-transferase 1                                           |                                                     |                                              |                                                |                       |                                       | •                                    |
| DEFB1                      | -13         | Beta-defensin 1-like                                                             | •                                                   |                                              | •                                              |                       |                                       | •                                    |
| CALCRL                     | -13         | Calcitonin receptor-like                                                         | •                                                   |                                              |                                                |                       |                                       | •                                    |
| C2                         | -13         | Complement component 2                                                           | •                                                   |                                              | •                                              |                       |                                       |                                      |
| CX3CL1                     | -14         | CX3CL1                                                                           |                                                     |                                              |                                                |                       |                                       | •                                    |
| STAT4                      | -15         | Signal transducer and activator of transcription 4                               |                                                     |                                              |                                                |                       |                                       |                                      |
| PPARG                      | -16         | Peroxisome proliferator-activated receptor gamma                                 |                                                     |                                              |                                                | •                     |                                       |                                      |
| CCL20                      | -16         | Chemokine (C-C motif) ligand 20                                                  | •                                                   |                                              |                                                |                       |                                       |                                      |
| PI15                       | -16         | Peptidase inhibitor 15                                                           |                                                     |                                              |                                                |                       |                                       |                                      |
| PK4                        | -16         | Pyruvate dehydrogenase kinase, isozyme 4                                         |                                                     |                                              |                                                |                       |                                       | •                                    |
| CD36                       | -18         | CD36 molecule (thrombospondin receptor)                                          | •                                                   |                                              | •                                              | •                     |                                       | •                                    |
| PTX3                       | -19         | Pentraxin 3, long                                                                | •                                                   |                                              | •                                              |                       |                                       |                                      |
| SLC7A8                     | -19         | Solute carrier family 7 (amino acid transporter light chain, L system), member 8 |                                                     |                                              |                                                |                       |                                       | •                                    |
| FGL1                       | -19         | Fibrinogen-like 1                                                                | •                                                   |                                              |                                                |                       |                                       |                                      |
| S100G                      | -20         | S100 calcium binding protein G                                                   |                                                     | •                                            |                                                |                       |                                       |                                      |
| AMY2B                      | -21         | Amylase, alpha 2B (pancreatic)                                                   |                                                     |                                              | •                                              |                       |                                       |                                      |
| EFEMP1                     | -24         | EGF containing fibulin-like extracellular matrix protein 1                       | •                                                   | •                                            |                                                | •                     |                                       |                                      |
| ACSM1                      | -29         | Acyl-CoA synthetase medium-chain family member 1                                 |                                                     |                                              |                                                |                       |                                       | •                                    |
| FGL2                       | -30         | Fibrinogen-like 2                                                                | •                                                   |                                              |                                                |                       |                                       |                                      |

**Table S9.** Expression of genes with fold changes based on biological themes, enriched functional-related gene clusters, and their expression based on the effect of TGF-β3 on juvenile MSCs.

| JM5C (TGF+; D28) vs. JM5C (TGF-; D0) |             |                                                                                  |   | Secreted/Signal/Glycoprotein/Disulfide bond (5.93) | ECM/ECM-receptor interaction/Focal adhesion/P13K-Akt (2.85) | Muscle protein/ Acetylation/Cytoplasm (1.36) | Leucine-rich (1.02) | Nucleotide-binding/GTP-binding (0.85) | Cell adhesion/Metal binding/Plasma Membrane (0.68) |
|--------------------------------------|-------------|----------------------------------------------------------------------------------|---|----------------------------------------------------|-------------------------------------------------------------|----------------------------------------------|---------------------|---------------------------------------|----------------------------------------------------|
| Gene Symbol                          | Fold Change | Gene Title                                                                       |   |                                                    |                                                             |                                              |                     |                                       |                                                    |
| COMP                                 | 363         | cartilage oligomeric matrix protein                                              | • | •                                                  |                                                             |                                              |                     |                                       | •                                                  |
| SERPINA1                             | 355         | serpin peptidase inhibitor, clade A (alpha-1 antiproteinase, antitrypsin), membe | • |                                                    |                                                             |                                              |                     |                                       |                                                    |
| COL9A2                               | 348         | similar to Collagen alpha 2(I) chain precursor                                   | • |                                                    |                                                             |                                              |                     |                                       |                                                    |
| SERPINA1                             | 315         | serpin peptidase inhibitor, clade A (alpha-1 antiproteinase, antitrypsin), membe | • |                                                    |                                                             |                                              |                     |                                       |                                                    |
| CHAD                                 | 264         | chondroadherin                                                                   | • | •                                                  |                                                             | •                                            |                     |                                       |                                                    |
| C1orf17                              | 256         | C1orf17, Procollagen galactosyltransferase 2 precursor                           |   |                                                    |                                                             |                                              |                     |                                       |                                                    |
| MGC148871                            | 164         | similar to SMAP-2b                                                               |   |                                                    |                                                             |                                              |                     |                                       |                                                    |
| ANGPTL7                              | 133         | angiopoietin-like 7                                                              | • |                                                    |                                                             |                                              |                     |                                       |                                                    |
| COL11A2                              | 104         | collagen, type XI, alpha 2                                                       | • | •                                                  |                                                             |                                              |                     |                                       | •                                                  |
| FRZB                                 | 94          | frizzled-related protein                                                         | • |                                                    |                                                             |                                              |                     |                                       | •                                                  |
| LR11                                 | 80          | a mosaic LDL receptor family member                                              |   |                                                    |                                                             |                                              |                     |                                       |                                                    |
| LRRC1                                | 70          | similar to Leucine rich repeat containing 1                                      |   |                                                    |                                                             |                                              | •                   |                                       |                                                    |
| CLECSF1                              | 68          | domain lectin, superfamily member 1(cartilage-derived)                           |   |                                                    |                                                             |                                              |                     |                                       |                                                    |
| COL2A1                               | 67          | collagen, type II, alpha 1                                                       | • | •                                                  |                                                             |                                              |                     |                                       | •                                                  |
| AGC1                                 | 64          | aggrecan 1                                                                       |   |                                                    |                                                             |                                              |                     |                                       |                                                    |
| COL2A1                               | 62          | collagen, type II, alpha 1                                                       | • |                                                    |                                                             |                                              |                     |                                       | •                                                  |
| ALPL                                 | 62          | alkaline phosphatase, liver/bone/kidney                                          | • | •                                                  |                                                             |                                              |                     |                                       | •                                                  |
| PTH1R                                | 59          | parathyroid hormone receptor 1                                                   |   |                                                    |                                                             |                                              |                     |                                       |                                                    |
| CP                                   | 56          | similar to Ceruloplasmin precursor (Ferroxidase)                                 | • |                                                    |                                                             |                                              |                     |                                       | •                                                  |
| F13A1                                | 54          | similar to Coagulation factor XIII A chain precursor (Coagulation factor XIIIa)  | • |                                                    |                                                             |                                              |                     |                                       |                                                    |
| ISM1                                 | 53          | Similar to C20orf82 (Angiogenesis inhibitor)                                     |   |                                                    |                                                             |                                              |                     |                                       |                                                    |
| JPH1                                 | 51          | similar to junctophilin 1                                                        |   |                                                    |                                                             |                                              |                     |                                       | •                                                  |
| LEF1                                 | 50          | similar to lymphoid enhancer binding factor-1                                    |   |                                                    |                                                             |                                              |                     |                                       |                                                    |
| RALA                                 | 48          | v-ral simian leukemia viral oncogene homolog A (ras related)                     |   |                                                    |                                                             |                                              |                     |                                       | • •                                                |
| APOD                                 | 46          | Apolipoprotein D                                                                 | • |                                                    |                                                             |                                              |                     |                                       |                                                    |
| DPT                                  | 45          | dermatopontin                                                                    | • | •                                                  |                                                             |                                              |                     |                                       | •                                                  |
| O6orf81                              | 43          | similar to Chromosome 6 open reading frame 81                                    |   |                                                    |                                                             |                                              |                     |                                       |                                                    |
| PDE6C                                | 43          | phosphodiesterase 6C, cGMP-specific, cone, alpha prime                           |   |                                                    |                                                             |                                              |                     |                                       | • •                                                |
| COL9A1                               | 43          | collagen, type IX, alpha 1                                                       | • |                                                    |                                                             |                                              |                     |                                       |                                                    |
| PTGS2                                | 42          | prostaglandin-endoperoxide synthase 2                                            | • |                                                    |                                                             |                                              |                     |                                       | •                                                  |
| CSPG2                                | -23         | chondroitin sulfate proteoglycan 2 (versican)                                    |   |                                                    |                                                             |                                              |                     |                                       |                                                    |
| CDH1                                 | -24         | Cadherin 1, type 1, E-cadherin (epithelial)                                      | • |                                                    |                                                             |                                              |                     |                                       | •                                                  |
| SLITRK2                              | -24         | similar to SLIT and NTRK-like family, member 2                                   | • |                                                    |                                                             | •                                            |                     |                                       | •                                                  |
| ADCY7                                | -25         | adenylate cyclase 7                                                              | • |                                                    |                                                             |                                              |                     |                                       | • •                                                |
| FCGR1                                | -25         | Fc fragment of IgG, high affinity I, receptor for                                |   |                                                    |                                                             |                                              |                     |                                       | •                                                  |
| DCLK1                                | -25         | doublecortin-like kinase 1                                                       |   |                                                    |                                                             |                                              |                     |                                       |                                                    |
| TPM2                                 | -25         | tropomyosin 2                                                                    |   |                                                    |                                                             |                                              |                     |                                       |                                                    |
| CXCL3                                | -26         | chemokine (C-X-C motif) ligand 3                                                 | • |                                                    |                                                             |                                              |                     |                                       |                                                    |
| GEM                                  | -26         | GTP-binding protein                                                              |   |                                                    |                                                             |                                              |                     |                                       | •                                                  |
| PTN                                  | -26         | pleiotrophin                                                                     | • |                                                    |                                                             |                                              |                     |                                       |                                                    |
| PRSS35                               | -26         | protease, serine, 35                                                             | • |                                                    |                                                             |                                              |                     |                                       |                                                    |
| CXCL6                                | -27         | chemokine (C-X-C motif) ligand 6 (granulocyte chemotactic protein 2)             |   |                                                    |                                                             |                                              |                     |                                       |                                                    |
| TAGLN                                | -27         | transgelin                                                                       |   |                                                    |                                                             | •                                            |                     |                                       |                                                    |
| CDH2                                 | -31         | cadherin 2                                                                       | • |                                                    |                                                             |                                              |                     |                                       | •                                                  |
| GNMB                                 | -31         | glycoprotein (transmembrane) nmb                                                 | • |                                                    |                                                             |                                              |                     |                                       | •                                                  |
| ACTA2                                | -32         | actin, alpha 2, smooth muscle, aorta                                             |   |                                                    |                                                             | •                                            |                     |                                       | •                                                  |
| PTH1R                                | -33         | parathyroid hormone-like hormone                                                 | • |                                                    |                                                             |                                              |                     |                                       | •                                                  |
| PPL                                  | -35         | similar to periplakin                                                            |   |                                                    |                                                             |                                              |                     |                                       |                                                    |
| ANXA3                                | -38         | annexin A3                                                                       |   |                                                    |                                                             |                                              |                     |                                       | •                                                  |
| FABP4                                | -40         | fatty acid binding protein 4, adipocyte                                          |   |                                                    |                                                             | •                                            |                     |                                       |                                                    |
| SRCL                                 | -41         | similar to scavenger receptor with C-type lectin type I                          |   |                                                    |                                                             |                                              |                     |                                       |                                                    |
| GNMB                                 | -42         | glycoprotein (transmembrane) nmb                                                 |   |                                                    |                                                             |                                              |                     |                                       | •                                                  |
| KIAA0101                             | -51         | KIAA0101 protein                                                                 |   |                                                    |                                                             | •                                            |                     |                                       |                                                    |
| DAF                                  | -54         | decay-accelerating factor 1                                                      |   |                                                    |                                                             |                                              |                     |                                       |                                                    |
| CXCL1                                | -61         | chemokine (C-X-C motif) ligand 1                                                 |   |                                                    |                                                             |                                              |                     |                                       |                                                    |
| WISP2                                | -65         | WNT1 inducible signaling pathway protein 2                                       | • | •                                                  |                                                             |                                              |                     |                                       |                                                    |
| EEF1A2                               | -69         | Eukaryotic translation elongation factor 1 alpha 2                               |   |                                                    |                                                             |                                              | •                   |                                       | •                                                  |
| FOSB                                 | -82         | FosB proto-oncogene, AP-1 transcription factor subunit                           |   |                                                    |                                                             |                                              |                     |                                       |                                                    |
| OLR1                                 | -98         | oxidized low density lipoprotein (lectin-like) receptor 1                        | • |                                                    |                                                             |                                              |                     |                                       | •                                                  |
| TTR                                  | -231        | transthyretin                                                                    | • |                                                    |                                                             |                                              |                     |                                       |                                                    |

**Table S10.** Expression of genes with fold changes based on biological themes, enriched functional-related gene clusters, and their expression levels for juvenile MSCs compared to chondrocytes at day 28.

| JCH (TGF+; D28) vs. JMSC (TGF+; D28) |             |                                                                               | Immunity (2.89) | Cell cycle/Cell division (2.52) | Mitosis/Cytoskeleton (2.52) | Secreted/Disulfide bond Glycoprotein (1.89) | Metal-binding/Zinc ion binding (0.98) | DNA-binding (0.48) | Nucleotide-binding/ATP-binding (0.17) | Membrane (0) |
|--------------------------------------|-------------|-------------------------------------------------------------------------------|-----------------|---------------------------------|-----------------------------|---------------------------------------------|---------------------------------------|--------------------|---------------------------------------|--------------|
| Gene Symbol                          | Fold Change | Gene Title                                                                    |                 |                                 |                             |                                             |                                       |                    |                                       |              |
| UTMP                                 | 263         | Uterine milk protein precursor                                                |                 |                                 |                             |                                             |                                       |                    |                                       |              |
| TPR                                  | 244         | Translocated Promoter Region, Nuclear Basket Protein                          |                 |                                 |                             |                                             |                                       |                    |                                       |              |
| PRG4                                 | 235         | Proteoglycan 4                                                                |                 |                                 |                             | •                                           |                                       |                    |                                       |              |
| KIAA0101                             | 88          | KIAA0101 protein                                                              |                 |                                 |                             |                                             |                                       |                    |                                       |              |
| GAL                                  | 68          | Galanin                                                                       |                 |                                 |                             | •                                           |                                       |                    |                                       |              |
| FABP                                 | 54          | Fatty acid binding protein ( heart ) like                                     |                 |                                 |                             |                                             |                                       |                    |                                       |              |
| RRM2                                 | 42          | Similar to Ribonucleoside-diphosphate reductase M2 chain                      |                 |                                 |                             |                                             |                                       |                    |                                       |              |
| PDE                                  | 41          | Similar to cyclic nucleotide phosphodiesterase                                |                 |                                 |                             |                                             |                                       |                    |                                       |              |
| TKTL1                                | 39          | Transketolase-like 1                                                          |                 |                                 |                             |                                             | •                                     |                    |                                       |              |
| CCNB2                                | 38          | Cyclin B2                                                                     |                 | •                               |                             |                                             |                                       |                    |                                       |              |
| UHRF1                                | 33          | Ubiquitin-like, containing PHD and RING finger domains, 1                     |                 | •                               |                             |                                             | •                                     | •                  |                                       |              |
| THBS4                                | 33          | Thrombospondin 4                                                              |                 |                                 |                             | •                                           |                                       |                    |                                       |              |
| CCNB1                                | 32          | Cyclin B1                                                                     |                 |                                 |                             |                                             |                                       |                    |                                       |              |
| CAPN6                                | 32          | Similar to calpain 6                                                          |                 |                                 |                             |                                             |                                       |                    |                                       |              |
| CENP-A                               | 32          | Similar to Histone H3-like centromeric protein A                              |                 |                                 |                             |                                             |                                       | •                  |                                       |              |
| LRRC17                               | 30          | Leucine rich repeat containing 17                                             |                 |                                 |                             | •                                           |                                       |                    |                                       |              |
| SPAG5                                | 26          | Similar to Sperm associated antigen 5                                         |                 |                                 |                             |                                             |                                       |                    |                                       |              |
| CDCA3                                | 26          | Cell division cycle associated 3                                              |                 | •                               |                             |                                             |                                       |                    |                                       |              |
| AURKB                                | 25          | Aurora kinase B                                                               |                 | •                               |                             |                                             | •                                     |                    | •                                     |              |
| CENP-F                               | 25          | Similar to centromere protein F (350/400kD)                                   |                 |                                 |                             |                                             |                                       |                    |                                       |              |
| CPE                                  | 24          | Carboxypeptidase E                                                            |                 |                                 |                             | •                                           | •                                     |                    |                                       | •            |
| ADH6                                 | 22          | Similar to Alcohol dehydrogenase 6                                            |                 |                                 |                             |                                             | •                                     |                    |                                       |              |
| CDC2                                 | 21          | Cell division cycle 2, G1 to S and G2 to M                                    |                 |                                 |                             |                                             |                                       |                    |                                       |              |
| ASPM                                 | 20          | Asp (abnormal spindle) homolog, microcephaly associated (Drosophila)          |                 | •                               |                             |                                             |                                       |                    |                                       |              |
| KIF20A                               | 20          | Kinesin family member 20A                                                     |                 | •                               |                             |                                             |                                       |                    | •                                     |              |
| SLC1A3                               | 20          | Solute carrier family 1 (glial high affinity glutamate transporter), member 3 |                 |                                 |                             |                                             |                                       |                    |                                       | •            |
| LBP                                  | 20          | Lipopolysaccharide binding protein                                            |                 | •                               |                             | •                                           |                                       |                    |                                       | •            |
| RALDHr                               | 19          | Similar to Retinal short chain dehydrogenase reductase                        |                 |                                 |                             |                                             |                                       |                    |                                       |              |
| HMGB3                                | 19          | Similar to High-mobility group box 3                                          |                 |                                 |                             | •                                           |                                       | •                  |                                       |              |
| TMEM16A                              | 18          | Similar to transmembrane protein 16A                                          |                 |                                 |                             |                                             |                                       |                    |                                       |              |
| C9orf61                              | -5          | Similar to Chromosome 9 open reading frame 61                                 |                 |                                 |                             |                                             |                                       |                    |                                       |              |
| GCLM                                 | -5          | Glutamate-cysteine ligase, modifier subunit                                   |                 |                                 |                             |                                             |                                       |                    |                                       |              |
| IL18                                 | -5          | Interleukin 18 (interferon-gamma-inducing factor)                             |                 |                                 |                             | •                                           |                                       |                    |                                       |              |
| COL10A1                              | -5          | Collagen, type X, alpha 1(Schmid metaphyseal chondrodysplasia)                |                 |                                 |                             | •                                           |                                       |                    |                                       |              |
| FGB                                  | -5          | Fibrinogen beta chain                                                         |                 | •                               |                             | •                                           |                                       |                    |                                       |              |
| C3                                   | -5          | Complement component 3                                                        |                 | •                               |                             | •                                           |                                       |                    |                                       |              |
| DEFB1                                | -5          | Defensin, beta 1                                                              |                 |                                 |                             |                                             |                                       |                    |                                       |              |
| OAS1                                 | -5          | 2',5'-oligoadenylate synthetase 1, 40/46kDa                                   |                 |                                 |                             |                                             |                                       |                    |                                       |              |
| PAX6                                 | -6          | Paired box 6                                                                  |                 |                                 |                             |                                             |                                       | •                  |                                       |              |
| DPEP1                                | -6          | Similar to dipeptidase 1 (renal)                                              |                 |                                 |                             | •                                           | •                                     |                    |                                       | •            |
| ABCA1                                | -6          | ATP-binding cassette, sub-family A (ABC1), member 1                           |                 |                                 |                             |                                             |                                       |                    | •                                     | •            |
| FBXO32                               | -6          | F-box protein 32                                                              |                 |                                 |                             |                                             |                                       |                    |                                       |              |
| ABLIM3                               | -6          | Similar to KIAA0843 protein                                                   |                 |                                 |                             | •                                           |                                       |                    |                                       |              |
| CARD8                                | -6          | Similar to CARD8 protein                                                      |                 |                                 |                             |                                             |                                       |                    |                                       |              |
| EIF4E                                | -6          | Eukaryotic translation initiation factor 4E                                   |                 |                                 |                             | •                                           |                                       |                    |                                       |              |
| CLEC2H                               | -6          | Similar to C-type lectin domain family 2, member h                            |                 |                                 |                             |                                             |                                       |                    |                                       |              |
| TCR                                  | -7          | T cell receptor delta                                                         |                 |                                 |                             |                                             |                                       |                    |                                       |              |
| PLEKHB1                              | -7          | Pleckstrin homology domain containing, family B (evectins) member 1           |                 |                                 |                             |                                             |                                       |                    |                                       |              |
| CENP110                              | -7          | Similar to centrosomal protein 110kDa                                         |                 |                                 |                             |                                             |                                       |                    |                                       |              |
| PLS1                                 | -7          | plastin 1 (I isoform)                                                         |                 |                                 |                             | •                                           | •                                     |                    |                                       |              |
| ABCA1                                | -7          | ATP-binding cassette, sub-family A (ABC1), member 1                           |                 |                                 |                             |                                             |                                       |                    |                                       |              |
| ISG15                                | -7          | ISG15 ubiquitin-like modifier                                                 |                 |                                 |                             | •                                           |                                       |                    |                                       |              |
| IFI44L                               | -7          | Similar to Interferon-induced protein 44-like                                 |                 |                                 |                             |                                             |                                       |                    |                                       |              |
| MX1                                  | -8          | Myxovirus (influenza virus) resistance 1, interferon-inducible protein p78    |                 | •                               |                             |                                             |                                       |                    | •                                     | •            |
| MEIS2                                | -9          | Meis homeobox 2                                                               |                 |                                 |                             |                                             |                                       | •                  |                                       |              |
| CD200                                | -11         | CD200 molecule                                                                |                 |                                 |                             | •                                           |                                       |                    |                                       | •            |
| ITGA7                                | -12         | Similar to Integrin alpha-7 precursor                                         |                 |                                 |                             |                                             |                                       |                    |                                       | •            |
| REDD1                                | -13         | Similar to RTP801-like protein                                                |                 |                                 |                             |                                             |                                       |                    |                                       |              |
| ANGPTL7                              | -18         | Angiopoietin-like 7                                                           |                 |                                 |                             | •                                           |                                       |                    |                                       |              |
| CCL2                                 | -27         | Chemokine (C-C motif) ligand 2                                                |                 |                                 |                             | •                                           |                                       |                    |                                       |              |

Upregulate

Downregulate



**Table S11.** Expression of genes with fold changes based on biological themes, enriched functional-related gene clusters, and their expression levels between juvenile chondrocytes with TGF- $\beta$ 3 and undifferentiated juvenile MSCs.

| <b>JCH (TGF+; D28) vs. JMCS (TGF-; D0)</b> |                    |                                                                                  | Secreted/Disulfide bond/Glycoprotein (5.44) | ECM/Calcium (3.26) | EGF-like domain (2.76) | Lipoprotein/Cell membrane (0.26) |
|--------------------------------------------|--------------------|----------------------------------------------------------------------------------|---------------------------------------------|--------------------|------------------------|----------------------------------|
| <b>Gene Symbol</b>                         | <b>Fold Change</b> | <b>Gene Title</b>                                                                |                                             |                    |                        |                                  |
| SERPINA1                                   | 1131               | Serpin peptidase inhibitor, clade A (alpha-1 antitrypsin, antitrypsin), membe    | •                                           |                    |                        |                                  |
| TPR                                        | 611                | Translocated promoter region, nuclear basket protein                             |                                             |                    |                        |                                  |
| CAPN6                                      | 490                | Calpain 6                                                                        |                                             |                    |                        |                                  |
| PRG4                                       | 468                | Proteoglycan 4                                                                   |                                             |                    |                        |                                  |
| COL9A2                                     | 452                | Collagen alpha 2(IX) chain precursor                                             |                                             |                    |                        |                                  |
| COMP                                       | 388                | Cartilage oligomeric matrix protein                                              | •                                           | •                  | •                      |                                  |
| COLGALT2                                   | 371                | Procollagen galactosyltransferase 2 precursor (Similar to C1orf17)               |                                             |                    |                        |                                  |
| CHAD                                       | 231                | Chondroadherin                                                                   | •                                           | •                  |                        |                                  |
| UTMP                                       | 227                | Uterine milk protein precursor                                                   |                                             |                    |                        |                                  |
| SMAP2b                                     | 164                | Small ArfGAP2                                                                    |                                             |                    |                        |                                  |
| THBS4                                      | 163                | Thrombospondin 4                                                                 | •                                           | •                  | •                      |                                  |
| FRZB                                       | 140                | Frizzled-related protein                                                         | •                                           |                    |                        | •                                |
| DPT                                        | 115                | Dermatopontin                                                                    | •                                           | •                  |                        |                                  |
| COL11A2                                    | 113                | Collagen, type XI, alpha 2                                                       | •                                           | •                  |                        |                                  |
| PTGS2                                      | 106                | Prostaglandin-endoperoxide synthase 2 (prostaglandin G/H synthase and cyclooxyge | •                                           |                    | •                      | •                                |
| MAL                                        | 94                 | Mal, T-cell differentiation protein-like                                         | •                                           |                    |                        | •                                |
| COL2A1                                     | 90                 | Collagen, type II, alpha 1                                                       | •                                           | •                  |                        |                                  |
| CLECSF1                                    | 86                 | Domain lectin, superfamily member 1(cartilage-derived)                           |                                             |                    |                        |                                  |
| CACCS2                                     | 80                 | Calcium-activated chloride channel-2                                             |                                             |                    |                        |                                  |
| F13A1                                      | 75                 | Coagulation factor XIII A chain precursor (Coagulation factor XIIIa)             | •                                           | •                  |                        |                                  |
| LR11                                       | 72                 | Mosaic protein LR11                                                              |                                             |                    |                        |                                  |
| LRRC1                                      | 71                 | Leucine rich repeat containing 1                                                 |                                             |                    |                        |                                  |
| CXCL14                                     | 65                 | Small inducible cytokine B14 precursor                                           |                                             |                    |                        |                                  |
| COL2A1                                     | 64                 | Collagen, type II, alpha 1                                                       |                                             |                    |                        |                                  |
| CA9                                        | 64                 | p54/58N                                                                          |                                             |                    |                        | •                                |
| GAL                                        | 59                 | Galanin                                                                          | •                                           |                    |                        |                                  |
| CP                                         | 59                 | Ceruloplasmin precursor (Ferroxidase)                                            |                                             |                    |                        |                                  |
| COX6B2                                     | 57                 | Cytochrome c oxidase subunit VIb testes-specific isoform                         | •                                           |                    |                        |                                  |
| AGC1                                       | 56                 | Aggrecan 1                                                                       |                                             |                    |                        |                                  |
| MATN2                                      | 55                 | Matrilin 2                                                                       | •                                           | •                  |                        |                                  |
| CPT1A                                      | -17                | Carnitine O-palmitoyltransferase                                                 |                                             |                    |                        | •                                |
| STAC                                       | -18                | Stac protein (SRC homology 3 and cysteine-rich domain protein)                   |                                             |                    |                        |                                  |
| NID1                                       | -19                | Nidogen 1                                                                        | •                                           | •                  | •                      |                                  |
| BNBD-4                                     | -19                | Neutrophil beta-defensin 4                                                       |                                             |                    |                        |                                  |
| MEIS2                                      | -20                | Meis homeobox 2                                                                  |                                             |                    |                        |                                  |
| NTN4                                       | -20                | Netrin 4                                                                         | •                                           |                    |                        |                                  |
| GNG11                                      | -20                | Guanine nucleotide binding protein (G protein), gamma 11                         |                                             | •                  |                        | •                                |
| MARCKS                                     | -21                | Myristoylated alanine-rich protein kinase C substrate                            |                                             |                    |                        | •                                |
| PRSS35                                     | -21                | Protease, serine, 35                                                             | •                                           |                    |                        |                                  |
| ME3                                        | -22                | Malic enzyme 3, NADP(+)-dependent, mitochondrial                                 |                                             |                    |                        |                                  |
| RASGEF1B                                   | -22                | RasGEF domain family, member 1B                                                  |                                             |                    |                        |                                  |
| C2                                         | -22                | Complement component 2                                                           | •                                           |                    |                        |                                  |
| SVEP1                                      | -24                | Polydom                                                                          | •                                           | •                  | •                      |                                  |
| CDH1                                       | -25                | Cadherin 1, type 1, E-cadherin (epithelial)                                      | •                                           | •                  | •                      | •                                |
| FABP4                                      | -25                | Fatty acid binding protein 4, adipocyte                                          |                                             |                    |                        |                                  |
| FOSB                                       | -28                | FosB Proto-Oncogene, AP-1 Transcription Factor Subunit                           |                                             |                    |                        |                                  |
| PTGER4                                     | -30                | Prostaglandin E receptor 4 (subtype EP4)                                         | •                                           |                    |                        | •                                |
| GNPMB                                      | -31                | Glycoprotein (transmembrane) nmb                                                 |                                             |                    |                        |                                  |
| SDF1                                       | -31                | Stromal cell-derived factor 1                                                    |                                             |                    |                        |                                  |
| CXCL6                                      | -32                | Chemokine (C-X-C motif) ligand 6 (granulocyte chemotactic protein 2)             |                                             |                    |                        |                                  |
| FCGR1                                      | -35                | Fc fragment of IgG, high affinity I, receptor for                                |                                             |                    |                        |                                  |
| ANXA3                                      | -35                | Annexin A3                                                                       |                                             | •                  | •                      |                                  |
| TTR                                        | -35                | Transthyretin                                                                    | •                                           |                    |                        |                                  |
| CXCL3                                      | -37                | Chemokine (C-X-C motif) ligand 3                                                 | •                                           |                    |                        |                                  |
| PPL                                        | -41                | Periplakin                                                                       |                                             |                    |                        |                                  |
| GNPMB                                      | -54                | Glycoprotein (transmembrane)                                                     |                                             |                    |                        | •                                |
| EEF1A2                                     | -74                | Eukaryotic translation elongation factor 1 alpha 2                               |                                             |                    |                        |                                  |
| CXCL1                                      | -80                | Chemokine (C-X-C motif) ligand 1                                                 |                                             |                    |                        |                                  |
| OLR1                                       | -88                | Oxidized low density lipoprotein (lectin-like) receptor 1                        | •                                           |                    |                        | •                                |
| WISP2                                      | -99                | WNT1 inducible signaling pathway protein 2                                       |                                             | •                  |                        |                                  |

**Table S12.** Differences in expression profiles and their fold changes in juvenile chondrocytes and MSCs over 28 days of culture, in the absence or presence of TGF- $\beta$ 3.

|            |              | JCH vs. JM5C                                                                     |                                                                |                                |        |
|------------|--------------|----------------------------------------------------------------------------------|----------------------------------------------------------------|--------------------------------|--------|
|            | Gene Symbol  | Gene Title                                                                       | JCH+ vs. JM5C+                                                 | JCH+ vs. JM5C- JM5C+ vs. JM5C- |        |
| Upregulate | UTMP         | Uterine milk protein precursor                                                   | 263                                                            | 218 -1                         |        |
|            | TPR          | Translocated Promoter Region, Nuclear Basket Protein                             | 244                                                            | 611 3                          |        |
|            | PRG4         | Proteoglycan 4                                                                   | 235                                                            | 468 2                          |        |
|            | KIAA0101     | KIAA0101 protein                                                                 | 88                                                             | 2 -51                          |        |
|            | GAL          | Galanin                                                                          | 68                                                             | 59 -1                          |        |
|            | FABP         | Fatty acid binding protein ( heart ) like                                        | 54                                                             | 2 -23                          |        |
|            | RRM2         | Smilar to Ribonucleoside-diphosphate reductase M2 chain                          | 42                                                             | 3 -15                          |        |
|            | PDE          | Similar to cyclic nucleotide phosphodiesterase                                   | 41                                                             | 39 -1                          |        |
|            | TKTL1        | Transketolase-like 1                                                             | 39                                                             | 44 1                           |        |
|            | CCNB2        | Cyclin B2                                                                        | 38                                                             | 2 -20                          |        |
|            | UHRF1        | Ubiquitin-like, containing PHD and RING finger domains, 1                        | 33                                                             | 3 -13                          |        |
|            | THBS4        | Thrombospondin 4                                                                 | 33                                                             | 163 5                          |        |
|            | CCNB1        | Cyclin B1                                                                        | 32                                                             | 3 -13                          |        |
|            | CAPN6        | Similar to calpain 6                                                             | 32                                                             | 490 15                         |        |
|            | CENP-A       | Similar to Histone H3-like centromeric protein A                                 | 32                                                             | 4 -8                           |        |
|            | LRRC17       | Leucine rich repeat containing 17                                                | 30                                                             | 40 1                           |        |
|            | SPAG5        | Similar to Sperm associated antigen 5                                            | 26                                                             | 4 -6                           |        |
|            | CDCA3        | Cell division cycle associated 3                                                 | 26                                                             | 3 -9                           |        |
|            | AURKB        | Aurora kinase B                                                                  | 25                                                             | 2 -11                          |        |
|            | CENP-F       | Similar to centromere protein F (350/400kD)                                      | 25                                                             | 3 -7                           |        |
|            | CPE          | Carboxypeptidase E                                                               | 24                                                             | 30 1                           |        |
|            | ADH6         | Similar to Alcohol dehydrogenase 6                                               | 22                                                             | 17 -1                          |        |
|            | CDC2         | Cell division cycle 2, G1 to S and G2 to M                                       | 21                                                             | 3 -8                           |        |
|            | ASPM         | Asp (abnormal spindle) homolog, microcephaly associated (Drosophila)             | 20                                                             | 3 -6                           |        |
|            | KIF20A       | Kinesin family member 20A                                                        | 20                                                             | 3 -6                           |        |
|            | SLC1A3       | Solute carrier family 1 (glial high affinity glutamate transporter), member 3    | 20                                                             | 5 -4                           |        |
|            | LBP          | Lipopolysaccharide binding protein                                               | 20                                                             | 34 2                           |        |
|            | RALDHr       | Similar to Retinal short chain dehydrogenase reductase                           | 19                                                             | 22 1                           |        |
|            | HMGB3        | Similar to High-mobility group box 3                                             | 19                                                             | 1 -16                          |        |
|            | TMEM16A      | Similar to transmembrane protein 16A                                             | 18                                                             | 31 2                           |        |
|            | Downregulate | C9orf61                                                                          | Similar to Chromosome 9 open reading frame 61                  | -5                             | -1 -1  |
|            |              | GCLM                                                                             | Glutamate-cysteine ligase, modifier subunit                    | -5                             | 2 8    |
|            |              | IL18                                                                             | interleukin 18 (interferon-gamma-inducing factor)              | -5                             | -13 -3 |
|            |              | COL10A1                                                                          | collagen, type X, alpha 1(Schmid metaphyseal chondrodysplasia) | -5                             | 2 8    |
|            |              | FGB                                                                              | fibrinogen beta chain                                          | -5                             | 2 8    |
|            |              | C3                                                                               | complement component 3                                         | -5                             | 1 7    |
|            |              | DEFB1                                                                            | defensin, beta 1                                               | -5                             | -4 1   |
|            |              | OAS1                                                                             | 2',5'-oligoadenylate synthetase 1, 40/46kDa                    | -5                             | -2 3   |
|            |              | PAX6                                                                             | Paired box 6                                                   | -6                             | -6 -1  |
|            |              | DPEP1                                                                            | similar to dipeptidase 1 (renal)                               | -6                             | 1 6    |
|            |              | ABCA1                                                                            | ATP-binding cassette, sub-family A (ABC1), member 1            | -6                             | -3 2   |
|            |              | FBXO32                                                                           | F-box protein 32                                               | -6                             | -4 2   |
|            |              | ABLIM3                                                                           | Similar to KIAA0843 protein                                    | -6                             | -6 -1  |
|            |              | CARD8                                                                            | similar to CARD8 protein                                       | -6                             | -6 1   |
|            |              | EIF4E                                                                            | eukaryotic translation initiation factor 4E                    | -6                             | -16 -3 |
| CLEC2H     |              | similar to C-type lectin domain family 2, member h                               | -6                                                             | -17 -3                         |        |
| TCR        |              | T cell receptor delta                                                            | -7                                                             | 2 14                           |        |
| PLEKHB1    |              | pleckstrin homology domain containing, family B (evectins) member 1              | -7                                                             | 1 10                           |        |
| CENP110    |              | Similar to centrosomal protein 110kDa                                            | -7                                                             | -2 3                           |        |
| PLS1       |              | plastin 1 (l isoform)                                                            | -7                                                             | -10 -1                         |        |
| ABCA1      |              | ATP-binding cassette, sub-family A (ABC1), member 1                              | -7                                                             | -3 2                           |        |
| ISG15      |              | ISG15 ubiquitin-like modifier                                                    | -7                                                             | -4 2                           |        |
| IFI44L     |              | similar to Interferon-induced protein 44-like                                    | -7                                                             | -7 1                           |        |
| MX1        |              | myxovirus (influenza virus) resistance 1, interferon-inducible protein p78 (mous | -8                                                             | -13 -2                         |        |
| MEIS2      |              | Meis homeobox 2                                                                  | -9                                                             | -20 -2                         |        |
| CD200      |              | CD200 molecule                                                                   | -11                                                            | -2 5                           |        |
| ITGA7      |              | similar to Integrin alpha-7 precursor                                            | -12                                                            | 4 41                           |        |
| REDD1      |              | similar to RTP801-like protein                                                   | -13                                                            | -3 5                           |        |
| ANGPTL7    |              | angiotensin-like 7                                                               | -18                                                            | 7 133                          |        |
| CCL2       |              | chemokine (C-C motif) ligand 2                                                   | -27                                                            | -12 2                          |        |

## Reference

1. Huang AH, Stein A, & Mauck RL (2010) Evaluation of the complex transcriptional topography of mesenchymal stem cell chondrogenesis for cartilage tissue engineering. *Tissue Eng Part A* 16(9):2699-2708.
